# Supplementary material for: Association of Birth Weight With Type 2 Diabetes and Glycemic Traits: A Mendelian Randomization Study
Source: PubMed Central journal article supplement (PMC6755534; doi:10.1001/jamanetworkopen.2019.10915), 2019-09-20
Supplement: jamanetwopen-2-e1910915-s001.pdf [file jamanetwopen-2-e1910915-s001.pdf]

## Supplementary Online Content

BIRTH-GENE (BIG) Study Working Group. Association of birth weight with type 2 diabetes and glycemic traits: a mendelian randomization study. *JAMA Netw Open*. 2019;2(9):e1910915. doi:10.1001/jamanetworkopen.2019.10915

**eMethods.** Mendelian Randomization Method

**eFigure 1.** Schematic Representation of a Mendelian Randomization Approach

**eFigure 2.** Genetic Association With Birth Weight

**eFigure 3.** Genetic Association With Risk of T2DM

**eFigure 4.** Association of Birth Weight With Risk of T2DM

**eFigure 5.** Causality Estimated From Individual Study

**eTable 1.** Baseline Characteristics of Included 49 Studies in the CHARGE-BIG Study

**eTable 2.** Assessment of Birth Weight and Covariates in the CHARGE-BIG Study

**eTable 3.** Assessment of Type 2 Diabetes in the CHARGE-BIG Study

**eTable 4.** Genotyping Information in the CHARGE-BIG Study

**eTable 5.** Distribution of Genotypes of Included 7 SNPs in the CHARGE-BIG Study

**eTable 6.** Associations Between Seven Loci Associated With Birth Weight and Various Anthropometric Measures Taken at Birth (Data From Summary Results)

**eTable 7.** Genetic Association of Birth Weight Genetic Variants With Glycemic Traits (Data From Summary Results)

**eTable 8.** Sixty Loci Associated With Birth Weight ( $P < 5 \times 10^{-8}$ ) in European Ancestry and/or Trans-Ancestry (Data From Summary Results)

**eTable 9.** Genetic Association of Birth Weight Related 60 Genetic Variants With Glycemic Traits (Data From Summary Results)

**eTable 10.** Association of the Genetic Risk Score With Birth Weight and *F* Statistic for the Instrumental Variable in the NHS, HPFS, and WHI Cohorts

**eTable 11.** Association of Birth Weight Genetic Risk Score With Confounders According to Quartiles of the GRS in the NHS, HPFS and WHI Studies

**eAppendix.** Description of Included Studies

**eReferences**

This supplementary material has been provided by the authors to give readers additional information about their work.

## **eMethods: Mendelian Randomization Method**

### **Study-level data**

#### ***Birth weight SNP selection and data sources***

To explore the causal effect of birth weight (BW) on T2DM (T2DM) in 49 individual studies from the CHARGE-BIG study, we calculated a genetic risk score using 7 SNPs for BW identified from previous EGG consortium. Genetic variants associated with BW at a genome-wide significant level ( $P < 5 \times 10^{-8}$ ) were obtained from EGG consortium with up to 153,781 individuals.<sup>1</sup>

#### ***Genetic risk score calculation***

To estimate the genetic predisposition to low BW, a genetic risk score (GRS) was calculated on the basis of the 7 above-mentioned SNPs (**eTable 1**).<sup>1</sup> We assumed that each SNP in the panel acts independently in an additive manner, and the genetic score was calculated by using a weighted method. Each SNP was weighted by its relative effect size ( $\beta$ -coefficient) obtained from the reported meta-analysis data.<sup>1</sup> We firstly created a weighted score using the equation: weighted score =  $\beta_1 \times \text{SNP}_1 + \beta_2 \times \text{SNP}_2 + \dots + \beta_n \times \text{SNP}_n$ , where  $\beta$  is the  $\beta$ -coefficient for each individual SNP, and  $n$  is number of SNPs. To reflect the number of BW-decreasing allele, we rescaled the weighted score using the following equation: weighted genetic risk score = weighted score  $\times$  (total number of SNPs / sum of the  $\beta$ -coefficients).

#### ***Meta-analysis and between-study heterogeneity***

We assessed between-cohort heterogeneity via Cochran's Q-statistic and  $I^2$ -statistics.<sup>2-4</sup> Histograms of the distribution of  $I^2$  were shown in the associations of BW with T2DM and glycemic traits, as well as the associations of the BW related GRS with glycemic traits. For the proposed cut-off of  $I^2 > 0.25$ , it means there is non-negligible heterogeneity between studies for associations. If there is non-negligible heterogeneity, we used random-effects meta-analysis throughout, otherwise, fixed effects meta-analysis were used.<sup>5</sup>

#### ***Standard errors and inference for the instrumental variable (IV) estimator***

After meta-analysis, we used the IV estimators to quantify the strength of the causal association of BW and T2DM.<sup>6</sup> The IV estimator, which is identical to that derived by the widely used two-stage least squares method,<sup>7</sup> was calculated as the  $\beta$  of the regression coefficients of GRS-T2DM and GRS-BW:

$$\beta_{IV} = \frac{\beta_{GRS\_T2D}}{\beta_{GRS\_BW}}$$

The standard error was calculated via the delta method as

$$se_{IV} = abs($$

Based on these estimates, we appealed to standard-normal asymptotics, with the resulting Wald test statistic and 95% confidence intervals given as

$$t_{IV} = \frac{\beta_{IV}}{se_{IV}} \quad CI_{IV} = \beta_{IV} \pm 1.96 se_{IV}$$

The p-value for the  $H_0: \beta_{IV} = 0$  was derived from the standard normal distribution. For the association with T2DM, the 95% CI estimates were back-transformed through the antilog and exponentiation, respectively.

For comparing the IV estimate  $\beta_{IV}$  and the conventional estimate  $\beta_{BW\_T2DM}$ , we considered the difference

$$\begin{aligned} & \beta_{Diff} \\ & = \beta_{IV} \\ & - \beta_{BW\_T2D} \end{aligned}$$

The corresponding standard error is

$$se_{Diff} = \sqrt{C}$$

We used again standard normal asymptotics for the difference, namely,

$$t_{Diff} = \frac{\beta_{Diff}}{se_{Diff}} \quad CI_{Diff} = \beta_{Diff} \pm 1.96 se_{Diff}$$

The p-value for the  $H_0: \beta_{Diff} = 0$  was derived from the standard normal distribution, and the confidence intervals were back-transformed as above.

Based on IV estimates, we tested the null hypothesis of no difference between the respective IV estimator and the conventional regression-based estimator of the effect of BW on T2DM by comparing the IV estimate  $\beta_{IV}$  and the conventional estimate  $\beta_{BW\_T2DM}$ , and then we used standard normal asymptotics for the difference, namely,  $t_{Diff} = \beta_{Diff} / se_{Diff}$ . The p-value for the null hypothesis was derived from the standard normal distribution.

### Summary-level data

#### ***BW SNP selection and data sources***

Both 7-SNP GRS<sup>1</sup> and 60-SNP GRS<sup>8</sup> for BW were calculated based on SNPs identified from previous two GWAS studies by EGG consortium, respectively.<sup>1,8</sup> To obtain precise estimates of the genetic association of BW GRS with T2DM and glycemic traits, summary data from the DIAGRAM consortium including 149,821 individuals of European descent for T2DM,<sup>9</sup> and summary data from MAGIC consortium with up to 133,010 individuals for glycemic traits were used, respectively.

#### ***Linkage disequilibrium assessment***

One requirement of MR analysis is that the selected SNPs must not be in linkage disequilibrium (LD) since if a selected SNP is highly correlated with other risk loci, this may result in confounding.<sup>10</sup> In order to verify that the SNPs in this study met this requirement, we measured LD between all selected SNPs using CEU samples from the 1000 Genomes Project using SNAP (<https://archive.broadinstitute.org/mpg/snap/ldsearchpw.php>).

#### ***MR estimates***

For the summary-level data from EGG, DIAGRAM, and MAGIC consortium, we conducted our MR analyses using summarized data, in particular the associations (beta-coefficients and standard errors) of each genetic variant with the BW and T2DM risk and glycemic traits.<sup>11</sup> The estimates of the causal effect of BW on T2DM risk and glycemic traits were pooled by using the inverse-variance weighted method,<sup>12</sup> MR-Egger method<sup>13</sup> and weighted median method.<sup>14</sup> Detailed information on these MR methods have been described previously.<sup>12,15</sup> It was recommended to use all these methods when there are multiple genetic variants to assess the robustness of any causal finding to different sets of assumptions.<sup>16</sup> The proposed inverse-variance weighted method gives the same estimates using these summarized data as the well-established two-stage least squares method that uses individual-level data.<sup>12</sup> The inverse-variance weighted (IVW) method provides a consistent estimate of the causal effect of BW on T2DM risk and glycemic traits when each of the genetic variants satisfies the assumptions of an instrumental variable.<sup>12</sup> Two further methods such as the MR-Egger method<sup>13</sup> and the weighted median method<sup>14</sup> have been proposed for providing consistent causal estimates from summarized data for multiple genetic variants.

#### ***Pleiotropy assessment and sensitivity analyses***

MR analyses assume that the chosen SNPs do not exert pleiotropic effects on the outcomes by operating through biological pathways independent of the exposure. However, in MR analyses, a SNP may influence the outcome via other factors if the SNP acts upon the other factors through the exposure itself.<sup>10</sup> The inclusion of SNPs that contribute through a pleiotropic pathway could bias estimates. This can be difficult to test when examining BW, which is influenced by many different environmental factors and physiological mechanisms. In this study, we used MR-Egger regression to detect the presence of pleiotropy.<sup>13</sup> In brief, the approach is based on Egger regression, which has been used to examine publication bias in the meta-analysis literatures. Using the MR-Egger method, the SNP's effect upon the exposure variable is plotted against its effect upon the outcome, and an intercept distinct from the origin provides evidence for pleiotropic effects. Additionally, the slope of the MR-Egger regression can provide pleiotropy-corrected causal estimates. An important condition of this approach is that the SNP-exposure association must be independent of the SNP's direct effects upon the outcome, which may not always be satisfied in cases where all pleiotropic effects are attributed to a single confounder. Nonetheless, the MR-Egger method can provide unbiased estimates even if all the chosen SNPs are invalid.<sup>13</sup>

In addition, the weighted median approach was used to examine causal effect and pleiotropy.<sup>14</sup> Using this method, MR estimates are ordered and weighted by the inverse of their variance. The weighted median approach offers some important advantages over MR-Egger because it improves precision. Therefore, the inverse-variance weighted, MR-Egger and weighted median methods were considered as sensitivity analyses for MR investigations with multiple genetic variants.<sup>12,14,15</sup>

For analyses of both study-level data and summary-level data, the effect size for each meta-analysis was reported in the main results as the effect on a one-standard-deviation (1-SD) change in BW or glycemic quantitative traits, because this metric is more interpretable than an arbitrary difference. Analyses were performed using Stata version 12 (StataCorp) and R version 3.2.3 (R Project for Statistical Computing). The threshold of statistical significance for T2DM as the primary outcome was  $P < 0.05$ . The threshold of significance for the analysis of glycemic traits as secondary outcomes was  $P < 0.01$  ( $0.05/4 = 0.01$ ).

### **Standardization of MR Estimates**

Data ( $\beta$  values) from the CHARGE-BIG study were standardized so that the association of BW with T2DM risk could be uniformly expressed in terms of standard deviations. For BW, 1-SD was assumed to correspond to 543 gram, according to the pooled SD from the EGG consortium.<sup>1</sup>

The EGG consortium reported estimates of variants in units of standard deviations of BW, while the MAGIC consortium did not. Therefore,  $\beta$  values from the MAGIC consortium were also standardized so that the association of BW with T2DM risk and glycemic traits could be also uniformly expressed in terms of standard deviations.

For fasting glucose, two-hour glucose and HbA1c from the MAGIC consortium, 1-SD was assumed to correspond to 13.1 mg/dl, 10.1 mg/dl and 0.535%, respectively, according to the pooled SD of studies included in a previous report from the MAGIC consortium.<sup>17</sup> 1-SD of 0.44 for log-transformed fasting insulin from Europeans was used.<sup>18</sup>

### **Calculation of absolute risk increases**

To estimate the absolute risk increase based on calculated odds ratio estimated for T2DM, the United States population level estimate of the incidence of T2DM by the Center for Disease Control and Prevention was used (7.8/1000 participant years of follow up).<sup>19</sup> The absolute risk increase associated with T2DM was then calculated using this formula:  $ARI = (OR-1)*AI$  where ARI is the absolute risk increase, OR is the odds ratio and AI is the absolute incidence in events per 1000 participant years.

**Figure 1 Schematic representation of a Mendelian randomization approach**

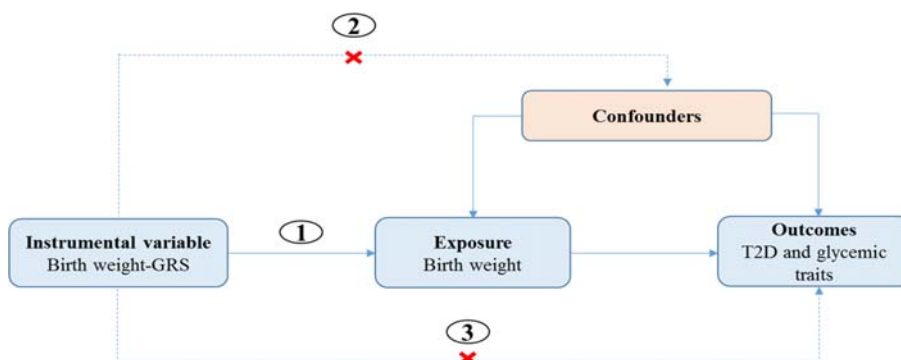

MR can be used to test the hypothesis that exposure (birth weight) causes outcome (T2DM and glycemic traits). Three assumptions of MR:

1. Genetic variants are associated with birth weight.
2. Genetic variants are not associated with confounders.
3. Genetic variants influence T2D and glycemic traits only through the birth weight, not through other pathways.

**Figure 2 Genetic association with birth weight**

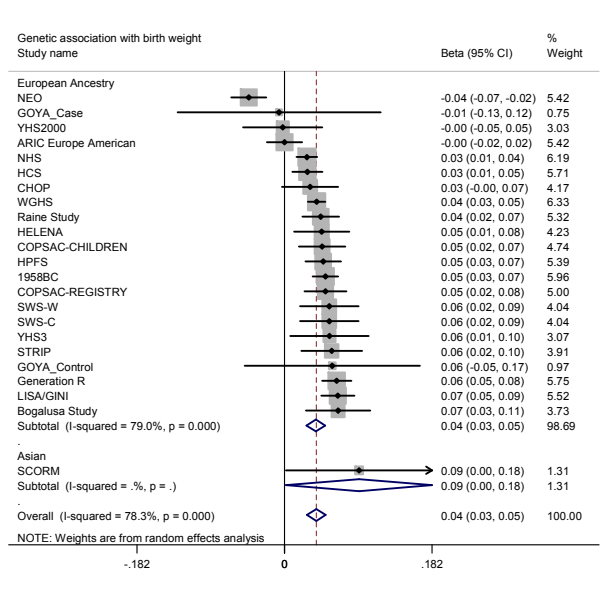

LISA/GINI: LISA/GINIplus.

Results were standardized to a 1-SD decrease in birth weight due to genetic variants.

The genetic risk score for low birth weight was selected as instrumental variable. The lower genetic risk score was associated with higher birth weight. Linear regression models were used to test the association of genetic risk score with birth weight, after adjustment of sex, gestational age and principal components for population stratification region in each study. We pooled  $\beta$  coefficients (1-SD of 543 gram in BW) across 23 studies using random-effect meta-analysis due to the heterogeneity between studies ( $I^2 = 79.2\%$ ,  $P < 0.001$ ).

**Figure 3 Genetic association with risk of T2DM**

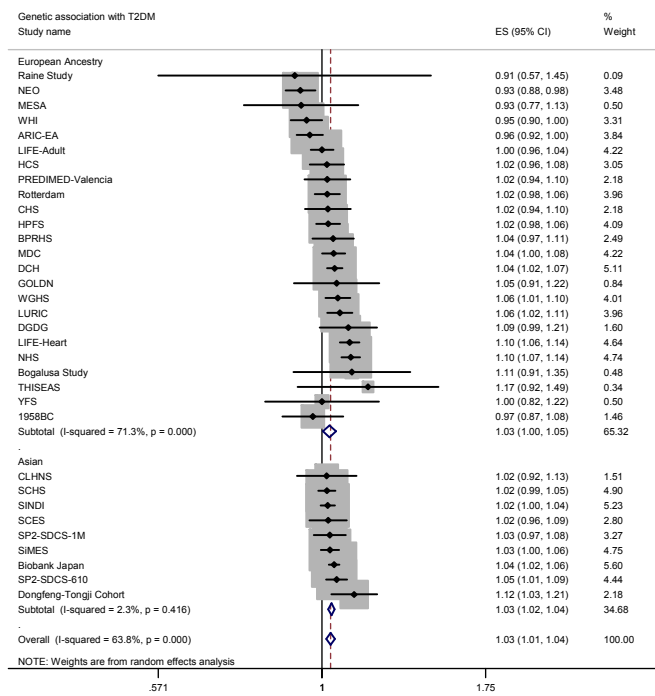

Logistical regression models were used to test the association of genetic risk score with risk of T2DM, after adjustment of gender, gestational age and principal components for population stratification region in each study. We pooled  $\beta$  coefficients across 33 studies using random-effect meta-analysis due to the heterogeneity among studies ( $I^2 = 64.0\%$ ,  $P < 0.001$ ).

**Figure 4 Association of birth weight with risk of T2DM**

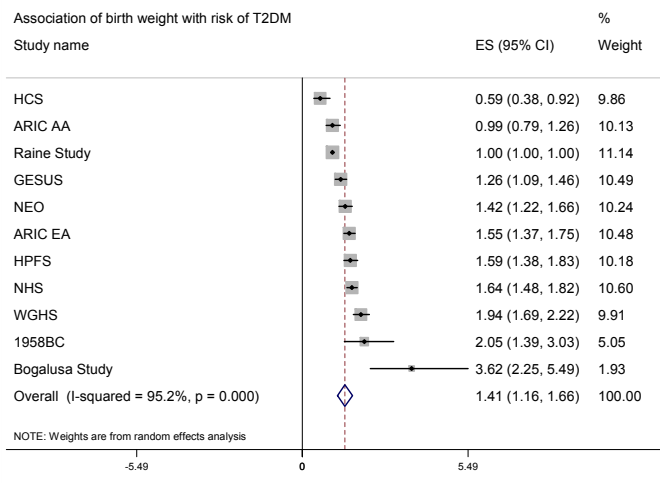

ARIC-AA: ARIC (African Ancestry)  
 ARIC-EA: ARIC (European Ancestry)

Logistic regression was used to test the association of birth weight with risk of T2DM after adjustment of sex, ethnicity, region, and other baseline covariates if available (age, BMI, smoking status, physical activity, total energy intake, and alcohol intake) in each study. We pooled OR (1-SD of 543 gram in BW) across 11 studies using random-effect meta-analysis due to the heterogeneity among studies ( $I^2 = 95.2\%$ ,  $P < 0.001$ ).

**eFigure 5 Causality estimated from individual study.**

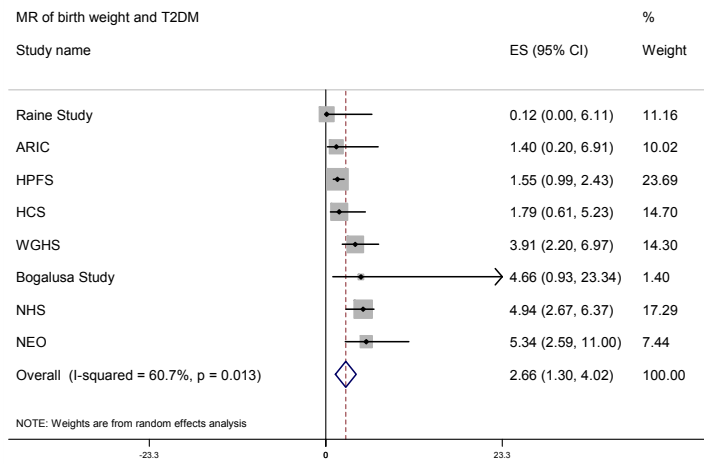

Results were standardized to a 1-SD decrease in birth weight due to genetic risk score. SD is 543 gram from EGG consortium.

We pooled OR across 8 studies that provided both GRS-BW and GRS-T2DM data using random-effect meta-analysis due to the heterogeneity among studies ( $I^2 = 60.7\%$ ,  $P = 0.013$ ).

**eTable 1. Baseline characteristics of included 49 studies in the CHARGE-BIG study**

| Full name                                                                                | Short name         | Sample size, n | Study design                                                        | Age, years | Baseline year(s) | BMI, kg/m <sup>2</sup> | Birth weight, kg | Male, n | Male, % | Current Smoker, n | Current Smoker, % | Alcohol intake, g/d | BMI ≥25 kg/m <sup>2</sup> , n | BMI ≥25 kg/m <sup>2</sup> , % | diabetes, n | diabetes, % | Ethnicity                        | Country              |
|------------------------------------------------------------------------------------------|--------------------|----------------|---------------------------------------------------------------------|------------|------------------|------------------------|------------------|---------|---------|-------------------|-------------------|---------------------|-------------------------------|-------------------------------|-------------|-------------|----------------------------------|----------------------|
| Nurses' Health Study                                                                     | NHS                | 11194          | combined several nested case-control studies                        | 57.9±6.7   | 1990             | 26.1±5.1               | 3.3±0.6          | 0       | 0.0     | 1532              | 13.7              | 5.2±9.0             | 5750                          | 51.4                          | 2177        | 20.9        | European Ancestry                | US.                  |
| Health Professionals follow-up Study                                                     | HPFS               | 6770           | combined several nested case-control studies                        | 55.7±4.8   | 1994             | 26.2±3.4               | 3.3±0.7          | 6770    | 100.0   | 391               | 5.8               | 11.6±15.4           | 4559                          | 67.3                          | 1299        | 16.9        | European Ancestry                | US                   |
| Diet, Cancer and Health cohort                                                           | DCH                | 3445           | Case-cohort (Incident T2D - random cohort)                          | 55.5±4.4   | 1994-1997        | 27.3±4.8               | NA               | 1716    | 49.8    | 1155              | 33.6              | 21.3±23.3           | 2300                          | 66.8                          | 1,812       | 52.6        | European Ancestry                | Denmark              |
| Genetics of Overweight Young Adults-obese case                                           | GOYA-obese         | 148            | Case-cohort (Only the OBESE CASES included in the present analyses) | 43.0±6.2   | 1943-1977        | 35.6±5.7               | 3.6±0.7          | 659     | 100.0   | 346               | 52.5              | 18.3±29.1           | NA                            | 99.2                          | NA          | NA          | European Ancestry                | Denmark              |
| Genetics of Overweight Young Adults-control                                              | GOYA-control       | 141            | Case-cohort (Only the control included in the present analyses)     | 43.0±6.2   | 1943-1977        | 35.6±5.7               | 3.6±0.7          | 659     | 100.0   | 346               | 52.5              | 18.3±29.1           | NA                            | 99.2                          | NA          | NA          | European Ancestry                | Denmark              |
| Western Australian Pregnancy Cohort (Raine) Study                                        | Raine Study        | 1688           | birth cohort                                                        | 20.0±0.4   | NA               | 24.6±5.1               | 3.4±0.7          | 801     | 52.0    | 148               | 15.6              | 17.6±19.6           | 368                           | 34.4                          | 3           | 0.2         | Mixed (Mainly European Ancestry) | Australia            |
| Copenhagen Prospective Studies on Asthma in Childhood Registry                           | COPSAC-REGISTRY    | 1191           | Asthma exacerbation cases                                           | At birth   | 1993             | NA                     | 3.6±0.5          | 792     | 66.4    | NA                | NA                | NA                  | NA                            | NA                            | NA          | NA          | European Ancestry                | Denmark              |
| Copenhagen Prospective Studies on Asthma in Childhood                                    | COPSAC-CHILDREN    | 932            | Birth Cohort                                                        | At birth   | 2007             | NA                     | 3.6±0.5          | 470     | 50.4    | NA                | NA                | NA                  | NA                            | NA                            | NA          | NA          | European Ancestry                | Denmark              |
| The Danish General Suburban Population Study                                             | GESUS              | 14169          | Cross-sectional                                                     | 53.7±12.9  | 2010-2013        | 26.6±4.6               | 3.5±0.5          | 6290    | 44.4    | 2468              | 17.4              | 12.1±15.1           | 8352                          | 59.0                          | 794         | 5.6         | European Ancestry                | Denmark              |
| Generation R                                                                             | Generation R       | 2701           | Population-based birth cohort                                       | At birth   | 0 (birth)        | NA                     | 3.6±0.5          | 1378    | 51.0    | NA                | NA                | NA                  | NA                            | NA                            | NA          | NA          | European Ancestry                | the Netherlands      |
| Young Finns Study                                                                        | YFS                | 1738           | longitudinal                                                        | 37.8±5.0   | 2007.00          | 25.8±4.5               | NA               | 774     | 44.5    | 328               | 18.9              | 8.8±13.6            | 890                           | 51.2                          | 37.00       | 2.1         | European Ancestry                | Finland              |
| Multi-Ethnic Study of Atherosclerosis study                                              | MESA               | 6361           | cohort                                                              | 62.2±10.2  | 2000             | 28.3±5.5               | NA               | 2084    | 47.3    | 125               | 2.0               | 5.2±13.0            | 4516                          | 71.0                          | 791         | 12.5        | Mixed (Mainly European Ancestry) | USA                  |
| Malmö Diet and Cancer Study                                                              | MDC                | 5040           | population based, cohort                                            | 57.5±5.9   | 1992-1996        | 25.7±4.0               | NA               | 2068    | 41.0    | 1379              | 27.4              | 10.4±12.6           | 2615                          | 51.9                          | 985         | 19.5        | European Ancestry                | Sweden               |
| Women's Genome Health Study                                                              | WGHS               | 12768          | Follow-up                                                           | 53.4±6.2   | 1992-1994        | 25.0±4.3               | 3.3±0.6          | 0       | 0.0     | 1322              | 0.1               | 7.7                 | 5169                          | 0.4                           | 796         | 0.1         | European Ancestry                | USA                  |
| Hellenic Study of Interactions between SNPs and Eating in Atherosclerosis Susceptibility | THISEAS            | 1677           | CAES-CONTROL                                                        | 59.1±13.7  | NA               | 28.4±4.7               | NA               | 59      | NA      | 28                | NA                | 8.9±17.5            | 70                            | NA                            | NA          | NA          | European Ancestry                | GREECE               |
| French T2D case-control                                                                  | DGDG               | 1279           | case-control                                                        | 56.5±8.7   | NA               | 24.5±2.7               | NA               | 694     | 50.4    | 350               | 25.4              | NA                  | 584                           | 42.4                          | NA          | NA          | European Ancestry                | France               |
| PREvencion con Dieta MEDiterranea-Valencia Study                                         | PREDIME D-Valencia | 1023           | Prospective cohort (intervention trial)                             | 66.8 ± 6.3 | 2003-2009        | 30.6 ± 4.7             | NA               | 371     | 36.3    | 129               | 12.6              | 5.8±10.4            | 945                           | 92.4                          | 475         | 46.4        | European Ancestry                | Spain                |
| Leipzig Research Centre for Civilization Diseases-Leipzig Heart                          | LIFE-Heart         | 5691           | patient cohort                                                      | 62.9±11.3  | 2006-2014        | 29.1±4.9               | NA               | 3954    | 69.5    | 1492              | 26.3              | NA                  | 4588                          | 80.6                          | 1780        | 31.3        | European Ancestry                | Germany              |
| Leipzig Research Centre for Civilization Diseases--Adult                                 | LIFE-Adult         | 4844           | population based, cross-sectional study                             | 62.5±11.1  | 2012-2014        | 27.7±4.6               | NA               | 2339    | 48.3    | 791               | 17.4              | 12.1±17.9           | 3437                          | 71.0                          | 714         | 14.8        | European Ancestry                | Germany              |
| Healthy Lifestyle in Europe by Nutrition in Adolescence                                  | HELENA             | 802            | Cross-sectional                                                     | 14.7±1.4   | NA               | 21.3±3.8               | 3.4±0.5          | 372     | 46.0    | NA                | NA                | NA                  | NA                            | NA                            | NA          | NA          | European Ancestry                | 9 European countries |
| Genetics of Lipid Lowering Drugs and Diet Network study                                  | GOLDN              | 819            | Prospective cohort                                                  | 48.8±16.2  | NA               | 28.5±5.5               | NA               | 413     | 50.4    | 251               | 30.7              | NA                  | 599                           | 73.1                          | NA          | NA          | European Ancestry                | USA                  |
| Boston Puerto Rican Health Study                                                         | BPRHS              | 1312           | Prospective cohort                                                  | 57.7±7.6   | 2000             | 31.9±6.6               | NA               | 378     | 28.8    | 321               | 24.5              | 1.5±0.6             | 1131                          | 86.20                         | NA          | NA          | Puerto Rican                     | USA                  |
| Southampton Women's Survey (women)                                                       | SWS-W              | 1060           | cohort                                                              | 28.1±3.8   | 1998-2002        | 25.4 ± 5.0             | 3.2±0.6          | 0       | 0.0     | NA                | NA                | NA                  | NA                            | NA                            | NA          | NA          | Mixed (Mainly European Ancestry) | UK                   |
| Southampton Women's Survey (children)                                                    | SWS-C              | 2005           | cohort                                                              | At birth   | 1999-2006        | NA                     | 3.5±0.5          | 1033    | 52.0    | NA                | NA                | NA                  | NA                            | NA                            | NA          | NA          | Mixed (Mainly European Ancestry) | UK                   |
| German Infant Study on the influence of Nutrition Intervention-LISA/GINI                 | LISA/GINI          | 1337           | prospective birth cohort studies                                    | At birth   | At birth         | NA                     | 3.4±0.4          | 686     | 51.3    | NA                | NA                | NA                  | NA                            | NA                            | NA          | NA          | European Ancestry                | Germany              |



|                                                         |                        |       |                                                                       |           |           |           |         |      |      |      |      |           |      |      |      |      |                                  |                      |           |
|---------------------------------------------------------|------------------------|-------|-----------------------------------------------------------------------|-----------|-----------|-----------|---------|------|------|------|------|-----------|------|------|------|------|----------------------------------|----------------------|-----------|
| Singapore Cohort Of the Risk factors for Myopia         | SCORM                  | 603   | Population-based                                                      | NA        | NA        | NA        | NA      | NA   | NA   | NA   | NA   | NA        | NA   | NA   | NA   | NA   | NA                               | Asian                | Singapore |
| Special Turku Coronary Risk Factor Intervention Project | STRIP                  | 674   | Prospective randomized intervention study                             | At birth  | NA        | NA        | 3.6±0.4 | 303  | 52.7 | NA   | NA   | NA        | NA   | NA   | NA   | NA   | NA                               | European Ancestry    | Finland   |
| Cebu Longitudinal Health and Nutrition Survey           | CLHNS                  | 1798  | Population-based                                                      | 48.5±6.1  | 2005      | 24.3±4.4  | NA      | 0    | NA   | 267  | 14.9 | NA        | 751  | 42.2 | 159  | 8.9  | Asian                            | Philippines          |           |
| Rotterdam Study                                         | Rotterdam              | 6291  | Prospective cohort                                                    | 70.6±9.8  | 1990-1992 | 29.3±15.1 | NA      | 2509 | 39.9 | 1409 | 22.4 | 10.4±15.0 | 3943 | 62.6 | 898  | 24.7 | European Ancestry                | The Netherlands      |           |
| Netherlands Epidemiology of Obesity                     | NEO                    | 5740  | Population Based Cohort                                               | 56.0±5.9  | 2008-2012 | 30.0±4.8  | 3.3±0.7 | 2756 | 48.0 | 918  | 16.0 | 15.5±17.5 | 5050 | 88.0 | 580  | 10.1 | European Ancestry                | The Netherlands      |           |
| European Childhood Obesity Project Study                | CHOP                   | 1678  | Nutritional Intervention Study (Birth Cohort with 11 years follow up) | At birth  | 2002-2004 | NA        | 3.2±0.3 | 850  | 50.7 | NA   | NA   | NA        | NA   | NA   | NA   | NA   | Mixed (Mainly European Ancestry) | 5 European countries |           |
| Women's Health Initiative                               | WHI                    | 5687  | Prospective                                                           | 68.1±5.9  | 1993      | 28.3±5.5  | NA      | 0    | 0.0  | 407  | 15.0 | 6.0±12.0  | 3944 | 69.4 | 491  | 8.6  | European Ancestry                | U.S.                 |           |
| Young Heart Study 2000                                  | YHS2000                | 306   | Cross-sectional                                                       | ~15       | NA        | 21.4±3.4  | 3.5±0.5 | 162  | 53.0 | NA   | NA   | NA        | NA   | NA   | NA   | NA   | European Ancestry                | Ireland              |           |
| Young Heart Study III                                   | YHS3                   | 339   | Cross-sectional                                                       | 22.5±1.7  | NA        | 23.8±3.6  | 3.5±0.5 | 169  | 50.0 | NA   | NA   | NA        | NA   | NA   | NA   | NA   | European Ancestry                | Ireland              |           |
| Dongfeng-Tongji Study                                   | Dongfeng-Tongji Cohort | 1452  | case-control                                                          | 63.8±8.1  | NA        | 24.9±3.4  | NA      | 1122 | 77.3 | 465  | 32.0 | 19.6±1.2  | 670  | 46.9 | 253  | 17.4 | Asian                            | China                |           |
| Hertfordshire Cohort Study                              | HCS                    | 2619  | Birth cohort study (born 1931 - 1939)                                 | 66.2±2.8  | 1999-2004 | 27.4±4.4  | 3.5±0.5 | 1467 | 52.9 | 343  | 12.4 | 10.4±15.8 | 1927 | 69.6 | 389  | 14.2 | European Ancestry                | UK                   |           |
| 1958 British Birth cohort                               | 1958BC                 | 4040  | Cohort study                                                          | 50.0      | 1958      | 27.4±4.9  | 3.4±0.5 | 2285 | 50.3 | 1047 | 23.8 | 66.4±51.1 | 2972 | 65.6 | 151  | 3.3  | European Ancestry                | UK                   |           |
| Biobank Japan                                           | Biobank Japan          | 25332 | Case-control                                                          | 51.8±15.6 | NA        | 22.4±3.7  | NA      | 1723 | 86.4 | NA   | NA   | NA        | NA   | NA   | 1650 | NA   | Asian                            | Japan                |           |
| Ludwigshafen Risk and Cardiovascular Health Study       | LURIC                  | 3061  | CHD cases and controls                                                | 62.7±10.6 | 1997-2000 | 27.5±4.0  | NA      | 2144 | 70.0 | 709  | 23.2 | 16.0±23.9 | 2196 | 71.7 | 1236 | 40.4 | European Ancestry                | Germany              |           |
| Atherosclerosis Risk in Communities Study               | ARIC-EA                | 8415  | Perspective Cohort Study                                              | 54.3±5.7  | 1987-1989 | 27.0±4.8  | 3.5±0.7 | 3991 | 47.4 | 2085 | 24.8 | 10.2±15.8 | 5285 | 62.8 | 2178 | 25.9 | European Ancestry                | America              |           |
| Atherosclerosis Risk in Communities Study               | ARIC-AA                | 2292  | Perspective Cohort Study                                              | 53.4±5.8  | 1987-1989 | 29.9±6.0  | 3.5±0.8 | 846  | 36.9 | 682  | 29.8 | 16.7±26.8 | 1843 | 80.4 | 987  | 43.1 | African American                 | America              |           |
| Bogalusa Heart Study                                    | Bogalusa Study         | 619   | cross-sectional studies                                               | 41.4±5.6  | NA        | 29.8±7.1  | 3.4±0.5 | 292  | 47.2 | 190  | 30.7 | NA        | 457  | 73.8 | 41   | 6.6  | European Ancestry                | America              |           |
| Singapore Malay Eye Study                               | SIMES                  | 2542  | Cohort-unrelated                                                      | 59.1±11.0 | NA        | 26.4±5.1  | NA      | 1258 | 49.5 | 529  | 20.8 | NA        | 1460 | 57.4 | 798  | 31.4 | Asian                            | Singapore            |           |
| Singapore Indian Eye Study                              | SINDI                  | 2538  | Cohort-unrelated                                                      | 58.0±10.0 | NA        | 26.2±4.8  | NA      | 1298 | 51.1 | 368  | 14.5 | NA        | 1441 | 56.8 | 976  | 38.5 | Asian                            | Singapore            |           |
| Diabetic Cohort-Singapore Prospective Study Program     | SP2-SDCS-1M            | 1884  | Cohort-unrelated                                                      | 55.1±13.4 | NA        | 24.1±3.9  | NA      | 1208 | 64.1 | 240  | 12.7 | NA        | 713  | 37.9 | 926  | 49.2 | Asian                            | Singapore            |           |
| Diabetic Cohort-Singapore Prospective Study Program     | SP2-SDCS-610           | 2232  | Cohort-unrelated                                                      | 56.5±13.3 | NA        | 23.9±4.1  | NA      | 699  | 30.0 | 157  | 7.0  | NA        | 796  | 35.7 | 1081 | 48.4 | Asian                            | Singapore            |           |
| Singapore Chinese Eye Study                             | SCES                   | 1889  | Population Based Cohort                                               | 58.4±9.5  | NA        | 23.7±3.5  | NA      | 963  | 51   | 246  | 13   | NA        | 600  | 1289 | 287  | 15   | Asian                            | Singapore            |           |
| Cardiovascular Health Study                             | CHS                    | 2820  | prospective                                                           | 72.3±5.4  | 1989-1990 | 26.0±4.3  | NA      | 1066 | 37.8 | 323  | 11.5 | 5.7±13.1  | 1585 | 56.2 | 258  | NA   | European Ancestry                | USA                  |           |
| Singapore Chinese Health Study                          | SCHS                   | 4570  | Case-control (T2D case-control)                                       | 55.7±7.4  | NA        | 23.7±3.4  | NA      | 2423 | 53.0 | 1233 | 27.0 | 1.8±7.7   | 1271 | 27.8 | 2281 | NA   | Asian                            | Singapore            |           |

Data for age, BMI, and birth weight are expressed as mean +/- SD.

**eTable 2. Assessment of birth weight and covariates in the CHARGE-BIG study**

|                   | Dietary assessment                            |                    | Birth weight, kg |                                    |                      | BMI, kg/m <sup>2</sup> |                                    |                     | Exclusion criteria                                                                    | Software for analysis | All participants provided written, informed consent, and ethical approval was granted by local ethics committees for participating studies. |
|-------------------|-----------------------------------------------|--------------------|------------------|------------------------------------|----------------------|------------------------|------------------------------------|---------------------|---------------------------------------------------------------------------------------|-----------------------|---------------------------------------------------------------------------------------------------------------------------------------------|
|                   | Measurement (FFQ/diet record/diet recall/etc) | Time of assessment | Mean ±SD         | Clinical measurement/self-reported | Time of measurement  | Mean ±SD               | Clinical measurement/self-reported | Time of measurement |                                                                                       |                       |                                                                                                                                             |
| NHS               | FFQ                                           | 1990               | 3.3 ± 0.6        | Self-reported                      | 1992                 | 26.1 ± 5.1             | Self-reported                      | 1990                | Exclude cancer cases                                                                  | SAS                   | Yes                                                                                                                                         |
| HPFS              | FFQ                                           | 1994               | 3.3 ± 0.7        | Self-reported                      | 1994                 | 26.2 ± 3.4             | Self-reported                      | 1994                | Exclude cancer cases                                                                  | SAS                   | Yes                                                                                                                                         |
| DCH               | FFQ                                           | 1994-1997          | NA               | NA                                 | NA                   | 27.3 ± 4.8             | Measured                           | 1994-1997           | NA                                                                                    | SAS                   | Yes                                                                                                                                         |
| GOYA obese cases  | NA                                            | NA                 | NA               | NA                                 | NA                   | 35.6 ± 5.7             | Measured                           | 1992-1994           | NA                                                                                    | SAS                   | Yes                                                                                                                                         |
| Raine             | FFQ                                           | 2010-2012          | 3.4 ± 0.5        | Clinical measurement               | 1989-1991            | 24.5 ± 5.2             | Clinical measurement               | 2010-2012           | NA                                                                                    | R                     | Yes                                                                                                                                         |
| COPSAC REGISTRY   | NA                                            | NA                 | 3.5 ± 0.5        | Self-reported                      | 1993                 | NA                     | NA                                 | NA                  | Excluded based on incomplete genetic or phenotypic data or non normal gestational age | R                     | Yes                                                                                                                                         |
| COPSAC            | NA                                            | NA                 | 3.5 ± 0.5        | Self-reported                      | 2007                 | NA                     | NA                                 | NA                  | Excluded based on incomplete genetic or phenotypic data or non normal gestational age | R                     | Yes                                                                                                                                         |
| WGHS              | FFQ                                           | 1992-1995          | 3.3 ± 0.6        | Self-reported                      | 1992-1995 (baseline) | 25.0 ± 4.3             | Clinical measurement               | 2010-2013           | NA                                                                                    | Stata                 | Yes                                                                                                                                         |
| GESUS             | NA                                            | NA                 | NA               | NA                                 | NA                   | NA                     | NA                                 | NA                  | NA                                                                                    | NA                    | NA                                                                                                                                          |
| Generation R      | NA                                            | NA                 | 3.6±0.5          | Clinical measurement               | 2002-2006            | NA                     | NA                                 | NA                  | NA                                                                                    | SPSS                  | Yes                                                                                                                                         |
| YFS               | FFQ                                           | 2007               | -                | NA                                 | NA                   | 25.8 ± 4.5             | Clinical measurement               | 2007                | -                                                                                     | R                     | Yes                                                                                                                                         |
| MESA              | NA                                            | NA                 | NA               | NA                                 | NA                   | NA                     | NA                                 | NA                  | NA                                                                                    | NA                    | NA                                                                                                                                          |
| MDC               | FFQ                                           | 1991-1994          | NA               | NA                                 | NA                   | 26.1 ± 5.1             | Clinical measurement               | 1992-1994           | NA                                                                                    | SPSS                  | Yes                                                                                                                                         |
| THISEAS           | FFQ                                           | 2010               | NA               | NA                                 | NA                   | 29.2 ± 4.5             | Clinical measurement               | 2010                | Ethnic outliers, implausible energy intake                                            | R                     | Yes                                                                                                                                         |
| DGDG              | FFQ                                           | 1994-2004          | NA               | NA                                 | NA                   | 24.5 ± 2.7             | Clinical measurement               | NA                  | NA                                                                                    | R                     | Yes                                                                                                                                         |
| PREDIMED-Valencia | FFQ                                           | 2003-2009          | N/A              | N/A                                | NA                   | 30.6 ± 4.7             | Clinical Mesured                   | 2003-2009           | Exclude baseline CVD cases and cancer cases                                           | SPSS                  | Yes                                                                                                                                         |
| LIFE-Heart        | NA                                            | NA                 | NA               | NA                                 | NA                   | 29.1 ± 4.9             | Measurement                        | 2006-2014           | Age<18y                                                                               | R                     | Yes                                                                                                                                         |
| LIFE-Adult        | FFQ                                           | 2012-2014          | NA               | NA                                 | NA                   | 27.7 ± 4.6             | Measurement                        | 2012-2014           | Age<18y                                                                               | R                     | Yes                                                                                                                                         |
| HELENA            | NA                                            | NA                 | 3.4 ± 0.5        | Self-reported                      | 2006-2007            | 21.3 ± 3.8             | Clinical measurement               | 2006-2007           | Exclude preterm births (gestational age<37 weeks)                                     | SAS                   | Yes                                                                                                                                         |

|                       |     |             |             |                                           |                    |             |                      |                                     |                                                                                                                                                                                                                                                                                   |            |     |
|-----------------------|-----|-------------|-------------|-------------------------------------------|--------------------|-------------|----------------------|-------------------------------------|-----------------------------------------------------------------------------------------------------------------------------------------------------------------------------------------------------------------------------------------------------------------------------------|------------|-----|
| GOLDN                 | NA  | NA          | NA          | NA                                        | NA                 | NA          | NA                   | NA                                  | NA                                                                                                                                                                                                                                                                                | NA         | NA  |
| BPRHS                 | NA  | NA          | NA          | NA                                        | NA                 | NA          | NA                   | NA                                  | NA                                                                                                                                                                                                                                                                                | NA         | NA  |
| SWS-W                 | NA  | NA          | 3.2 ± 0.6   | Self-reported                             | 1998-2002          | 25.4 ± 5.0  | Clinical measurement | 1998-2002                           | Multiple births                                                                                                                                                                                                                                                                   | Stata      | Yes |
| SWS-C                 | NA  | NA          | 3.5 ± 0.5   | Clinical measurement                      | 1999-2006          | NA          | -                    | -                                   | Pre-term births (multiple births excluded by design)                                                                                                                                                                                                                              | Stata      | Yes |
| LISA/GINI             | NA  | NA          | NA          | NA                                        | NA                 | NA          | NA                   | NA                                  | NA                                                                                                                                                                                                                                                                                | NA         | NA  |
| SCORM                 | NA  | NA          | NA          | NA                                        | NA                 | NA          | NA                   | NA                                  | NA                                                                                                                                                                                                                                                                                | NA         | NA  |
| STRIP                 | NA  | NA          | 3.6 ± 0.5   | Clinical records of the well-baby clinics | 1989-1991          | NA          | NA                   | NA                                  | Gestational age less than 37 weeks                                                                                                                                                                                                                                                | R          | Yes |
| CLHNS                 | NA  | NA          | NA          | NA                                        | NA                 | 24.3 ± 4.4  | Clinical measurement | 2005                                | NA                                                                                                                                                                                                                                                                                | R          | Yes |
| Rotterdam             | FFQ | 1989-1993   | NA          | NA                                        | NA                 | 29.3 ± 15.1 | Clinical measurement | 1989-1993                           | NA                                                                                                                                                                                                                                                                                | SPSS       | Yes |
| NEO                   | FFQ | 2008-2012   | 4.3 ± 0.7   | Self-reported                             | 2008-2012          | 30.0 ± 4.8  | Clinical measurement | 2008-2012                           | None                                                                                                                                                                                                                                                                              | SPSS       | Yes |
| CHOP                  | NA  | NA          | 3.3 ± 0.3   | Clinical measurement                      | 2002-2004          | NA          | NA                   | NA                                  | born <37th gestational week                                                                                                                                                                                                                                                       | SAS / R    | Yes |
| WHI                   | NA  | NA          | NA          | NA                                        | NA                 | NA          | NA                   | NA                                  | NA                                                                                                                                                                                                                                                                                | NA         | NA  |
| YH2000                | NA  | NA          | 3.5 ± 0.5   | Department of Health and Social Services  | 2000-2001          | 21.4 ± 3.4  | Clinical measurement | 2000-2001                           | Exclude multiple births and preterm births (gestational age <37 weeks)                                                                                                                                                                                                            | SAS        | Yes |
| YH3                   | NA  | NA          | 3.5 ± 0.5   | Department of Health and Social Services  | 1997-1999          | 23.8 ± 3.6  | Clinical measurement | 1997-1999                           | Exclude multiple births and preterm births (gestational age <37 weeks)                                                                                                                                                                                                            | SAS        | Yes |
| DF-TJ                 | NA  | NA          | NA          | NA                                        | NA                 | NA          | NA                   | NA                                  | Exclusion criteria included chemotherapy or radiotherapy for cancer and other severe diseases                                                                                                                                                                                     | SAS        | Yes |
| HCS                   | FFQ | 1999 - 2004 | 3.45 ± 0.51 | Clinical measurement                      | 1931 - 1939        | 27.4 ± 4.3  | Clinical measurement | 1999 - 2004                         | Exclude pre-term births (gestational age <37 weeks)                                                                                                                                                                                                                               | Stata      | Yes |
| 1958BC                | FFQ | 2000        | 3.4 ± 0.5   | Clinical measurement                      | 1958               | 27.4 ± 4.9  | Clinical measurement | 2002/3 (45 years biomedical survey) | None                                                                                                                                                                                                                                                                              | Stata      | Yes |
| Biobank Japan         | -   | -           | -           | -                                         | -                  | 22.8 ± 3.6  | Medical records      | NA                                  | The exclusion criteria for cases were individuals positive for antibody to glutamic acid decarboxylase (GAD) or those with diabetes due to liver dysfunction, steroids and other drugs that might raise glucose levels, malignancy or monogenic disorder known to cause diabetes. | R (v3.1.3) | Yes |
| LURIC                 | NA  | NA          | NA          | NA                                        | NA                 | 27.5 ± 4.03 | Measurement          | 1997-2000                           | Missing genotype data                                                                                                                                                                                                                                                             | SPSS       | Yes |
| ARIC Europe American  | FFQ | NA          | 3.5 ± 0.7   | Self-reported                             | visit 4(1996-1998) | 27.0 ± 4.9  | Clinical measurement | End of follow-up                    | NA                                                                                                                                                                                                                                                                                | Stata      | Yes |
| ARIC African American | FFQ | NA          | 3.5 ± 0.8   | Self-reported                             | visit 4(1996-1998) | 30.0 ± 6.2  | Clinical measurement | End of follow-up                    | NA                                                                                                                                                                                                                                                                                | Stata      | Yes |
| Bogalusa Study        | NA  | NA          | 3.4 ± 0.5   | Self-reported                             | 1973-1982          | 29.8 ± 7.1  | Clinical measurement | 2008                                | Excluding multiple births and, where information was available, preterm births (gestational age <37 weeks) from all analyses                                                                                                                                                      | R          | Yes |
| SIMES                 | NA  | NA          | NA          | NA                                        | NA                 | 0.56 ± 0.50 | Clinical measurement | 2004                                | NA                                                                                                                                                                                                                                                                                | R          | Yes |
| SINDI                 | NA  | NA          | NA          | NA                                        | NA                 | 26.1 ± 4.8  | Clinical measurement | 2007                                | NA                                                                                                                                                                                                                                                                                | R          | Yes |

|            |     |               |    |    |    |               |                             |           |                           |       |     |
|------------|-----|---------------|----|----|----|---------------|-----------------------------|-----------|---------------------------|-------|-----|
| DC-SP2-1M  | NA  | NA            | NA | NA | NA | 24.1±<br>3.8  | Clinical<br>measureme<br>nt | 2003-2007 | NA                        | R     | Yes |
| DC-SP2-610 | NA  | NA            | NA | NA | NA | 23.9±<br>4.1  | Clinical<br>measureme<br>nt | 2003-2007 | NA                        | R     | Yes |
| SCES       | NA  | NA            | NA | NA | NA | 23.7±<br>3.5  | Clinical<br>measureme<br>nt | 2007      | NA                        | R     | Yes |
| CHS        | FFQ | 1989-<br>1990 | NA | NA | NA | 26.0 ±<br>4.3 | Clinical<br>measureme<br>nt | 1989-1990 | Exclude baseline diabetes | Stata | Yes |
| SCHS       | FFQ | ?             | NA | NA | NA | 22.9 ±<br>3.4 | Self-<br>reported           | NA        | NA                        | Stata | Yes |

**eTable 3. Assessment of type 2 diabetes in the CHARGE-BIG study**

|                   | Outcome      | Measurement time point of disease     |                 |                                                         |                                                                                                                                                                |
|-------------------|--------------|---------------------------------------|-----------------|---------------------------------------------------------|----------------------------------------------------------------------------------------------------------------------------------------------------------------|
|                   |              | Incident/prevalent/incident+prevalent | Validation      | Self-reported/medical records/defined by researcher     | The way how it was defined by researcher                                                                                                                       |
| NHS               | Diabetes     | Incident+prevalent disease            | Validated       | Self-reported and validated                             | ICD-8 was used in validation study                                                                                                                             |
| HPFS              | Diabetes     | Incident+prevalent disease            | Validated       | Self-reported and validated                             | ICD-8 was used in validation study                                                                                                                             |
| DCH               | Diabetes     | Incident disease                      | Validated       | Medical records                                         | NA                                                                                                                                                             |
| GOYA              | Birth weight | Birth weight                          | NA              | Medical records                                         | NA                                                                                                                                                             |
| Raine             | Diabetes     | Incident +prevalent disease           | Validated       | Self-reported and validated                             | Usage of medication, diagnosed with diabetes by a doctor, fasting glucose > 7mmol/L after excluding ICD-9 T1D                                                  |
| COPSAC REGISTRY   | Birth weight | NA                                    | NA              | Medical records                                         | NA                                                                                                                                                             |
| COPSAC            | Birth weight | NA                                    | NA              | Medical records                                         | NA                                                                                                                                                             |
| GESUS             | Diabetes     | NA                                    | Self-reported   | Self-reported                                           | NA                                                                                                                                                             |
| Generation R      | Birth weight | Birth weight                          | NA              | Medical records                                         | NA                                                                                                                                                             |
| YFS               | Diabetes     | Incident+prevalent disease            | Validated       | Medical records                                         | NA                                                                                                                                                             |
| MESA              | NA           | NA                                    | NA              | NA                                                      | NA                                                                                                                                                             |
| MDC               | Diabetes     | Incident+prevalent disease            | Validated       | National and regional registers and cohort-measurements | Diagnosis by physician (if-glucose ≥7.0 mmol/L measured twice, or at least two HbA1c >6.9%, or ICD-10 codes E10-E14 and O244-0249, or ATC code A10 medication) |
| WGHS              | Diabetes     | Prevalent disease                     | Self-reported   | Self-reported                                           | NA                                                                                                                                                             |
| THISEAS           | Diabetes     | Prevalent disease                     | medical records | NA                                                      | NA                                                                                                                                                             |
| DGDG              | Diabetes     | Prevalent disease                     | NA              | NA                                                      | NA                                                                                                                                                             |
| PREDIMED-Valencia | Diabetes     | Prevalent disease                     | Validated       | Medical records                                         | Validated                                                                                                                                                      |
| LIFE-Heart        | Diabetes     | Prevalent disease                     | Validated       | Self-reported and defined by researcher                 | anamnesic diabetes OR diabetes medication OR HbA1c ≥6.5%                                                                                                       |
| LIFE-Adult        | Diabetes     | Prevalent disease                     | Validated       | Self-reported and defined by researcher                 | anamnesic diabetes OR diabetes medication OR HbA1c ≥6.5%                                                                                                       |
| HELENA            | Birth weight | NA                                    | NA              | Self-reported                                           | NA                                                                                                                                                             |

|                |              |                            |               |                                                                 |                                                                                                                                                                             |
|----------------|--------------|----------------------------|---------------|-----------------------------------------------------------------|-----------------------------------------------------------------------------------------------------------------------------------------------------------------------------|
| GOLDN          | Diabetes     | Incident+prevalent disease | Self-reported | Self-reported                                                   | NA                                                                                                                                                                          |
| BPRHS          | Diabetes     | Incident+prevalent disease | Self-reported | Self-reported                                                   | NA                                                                                                                                                                          |
| SWS-C          | Birth weight | -                          | NA            | N/A                                                             | NA                                                                                                                                                                          |
| LISA/GINI      | Birth weight | NA                         | NA            | NA                                                              | NA                                                                                                                                                                          |
| SCORM          | Birth weight | NA                         | Validated     | Medical records                                                 | NA                                                                                                                                                                          |
| CLHNS          | Diabetes     | Prevalent disease          | Validated     | Medical record + defined by researcher                          | NA                                                                                                                                                                          |
| RS             | Diabetes     | Incident+prevalent disease | Validated     | Medical records and clinical measurements                       | Fasting blood glucose $\geq 7.0$ mmol/L, a non-fasting blood glucose $\geq 11.1$ mmol/L (when fasting samples were absent), or the use of blood glucose lowering medication |
| NEO            | Diabetes     | Prevalent disease          | Validated     | Self-reported and validated                                     | Self-reported, use of glucose-lowering medication or fasting glucose $\geq 7.0$ mmol/L                                                                                      |
| CHOP           | Birth weight | NA                         | NA            | Medical records                                                 | NA                                                                                                                                                                          |
| WHI            | Diabetes     | Incident+prevalent disease | NA            | Medical records                                                 | NA                                                                                                                                                                          |
| YH2000         | Birth weight | NA                         | NA            | Department of Health and Social Services                        | NA                                                                                                                                                                          |
| YH3            | Birth weight | NA                         | NA            | Department of Health and Social Services                        | NA                                                                                                                                                                          |
| DF-TJ          | Diabetes     | Prevalent disease          | Validated     | Self-reported and validated                                     | ICD-9 was used in validation study                                                                                                                                          |
| HCS            | Diabetes     | Prevalent disease          | Validated     | Self-reported & OGTT                                            | NA                                                                                                                                                                          |
| 1958BC         | Diabetes     | Prevalent disease          | Self-reported | Self-reported                                                   | NA                                                                                                                                                                          |
| BBJ            | Diabetes     | Prevalent disease          | Validated     | Defined by researcher                                           | Diagnosed according to the WHO criteria.                                                                                                                                    |
| LURIC          | Diabetes     | Prevalent disease          | Validated     | Self-reported, 2H- $\alpha$ GTT, HbA1c measurement              | NA                                                                                                                                                                          |
| ARIC           | Diabetes     | Incident+prevalent disease | Validated     | Self-reported and validated by blood work and medication status | fasting glucose levels, taking medications for diabetes                                                                                                                     |
| Bogalusa Study | Diabetes     | Incident disease           | Validated     | Self-reported/medical records                                   | NA.                                                                                                                                                                         |
| SIMES          | Diabetes     | Prevalent disease          | Validated     | Defined by researcher                                           | A person is classified as diabetes if his/her hba1c $>= 6.5$ or on anti-diabetic drug or with age of diagnosis                                                              |
| SINDI          | Diabetes     | Prevalent disease          | Validated     | Defined by researcher                                           | A person is classified as diabetic if his/her hba1c $>= 6.5$ or on anti-diabetic drug or with age of diagnosis                                                              |
| DC-SP2         | Diabetes     | Prevalent disease          | Validated     | Defined by researcher                                           | A person is classified as diabetic if his/her is on anti-diabetic medication or with fasting glucose $> 7$                                                                  |
| SCES           | Diabetes     | Prevalent disease          | Validated     | Defined by researcher                                           | A person is classified as diabetes if his/her hba1c $>= 6.5$ or on anti-diabetic drug                                                                                       |
| CHS            | Diabetes     | Incident disease           | Validated     | Based on inventory of medications and fasting glucose           | NA                                                                                                                                                                          |
| SCHS           | Diabetes     | Incident disease           | NA            | Medical records                                                 | NA                                                                                                                                                                          |

**eTable 4. Genotyping information in the CHARGE-BIG study**

| Short name         | Disease outcome | Genetic risk score (GRS1)          |               |                  | Genotyping method                                                                    |                  | CCNL1 (rs900400) | ADCY5 (rs9883204) | HMG2 (rs1042725) | CDKAL1 (rs6931514) | Sq11.2 (rs4432842) | LCORL (rs724577) | ADRB1 (rs1801253)               | All participants provided written, informed consent, and ethical approval was granted by local ethics committees for participating studies. |
|--------------------|-----------------|------------------------------------|---------------|------------------|--------------------------------------------------------------------------------------|------------------|------------------|-------------------|------------------|--------------------|--------------------|------------------|---------------------------------|---------------------------------------------------------------------------------------------------------------------------------------------|
|                    |                 | Number of SNP included in analysis | Median (IQR)  | Range (min, max) | Genotyping method                                                                    | Sample call rate | EAF/HWE-Pvalue   | EAF/HWE-Pvalue    | EAF/HWE-Pvalue   | EAF/HWE-Pvalue     | EAF/HWE-Pvalue     | EAF/HWE-Pvalue   | EAF/HWE-Pvalue                  |                                                                                                                                             |
| NHS                | T2D             | 7                                  | 6.6 (2.5)     | (0.7, 13.2)      | TaqMan                                                                               | 97%              | 0.42/0.003       | 0.76/0.85         | 0.49/0.38        | 0.26/0.07          | 0.29/0.27          | 0.73/0.57        | 0.29/0.71                       | Yes                                                                                                                                         |
| HPFS               | T2D             | 7                                  | 6.7 (2.5)     | (0.8, 12.3)      | TaqMan                                                                               | 97%              | 0.43/0.82        | 0.76/0.33         | 0.51/0.85        | 0.26/0.77          | 0.27/0.09          | 0.75/0.45        | 0.31/0.90                       | Yes                                                                                                                                         |
| DCH                | T2D             | 7                                  | 6.4 (2.5)     | (0.9, 11.7)      | Illumina HumanCoreExome BeadChip                                                     | >95%             | 0.41/0.75        | 0.73/0.25         | 0.47/0.92        | 0.28/0.51          | 0.20/0.51          | 0.73/0.25        | 0.26/0.11                       | Yes                                                                                                                                         |
| GOYA               | Birth weight    | 7                                  | 6.4 (2.4)     | (1.8, 11.5)      | Illumina 610 k quad chip                                                             | >95%             | 0.42/0.81        | 0.74/0.10         | 0.48/0.69        | 0.30/0.33          | 0.21/0.44          | 0.74/0.60        | 0.26/0.97                       | Yes                                                                                                                                         |
| Raine              | T2D             | 7                                  | 6.4 (2.3)     | (1.7, 12.0)      | Illumina                                                                             | 97%              | 0.39/0.39        | 0.76/0.83         | 0.46/0.64        | 0.27/0.9           | 0.21/0.04          | 0.74/0.84        | 0.26/0.59                       | Yes                                                                                                                                         |
| COPSAC REGISTRY    | Birth weight    | 7                                  | 6.4 (2.5)     | (0.85, 12.4)     | Illumina SNP array                                                                   | 95%              | 0.41/0.43        | 0.71/0.79         | 0.47/0.22        | 0.28/0.035         | 0.31/0.87          | 0.73/0.55        | 0.25/0.20                       | Yes                                                                                                                                         |
| COPSAC CHILDREN    | Birth weight    | 7                                  | 6.4 (2.4)     | (1.5, 12.3)      | Illumina SNP array                                                                   | 95%              | 0.40/0.04        | 0.73/0.12         | 0.47/0.93        | 0.31/0.21          | 0.30/0.26          | 0.71/0.46        | 0.25/0.40                       | Yes                                                                                                                                         |
| GESUS              | T2D             | 7                                  | NA            | NA               | NA                                                                                   | NA               | NA               | NA                | NA               | NA                 | NA                 | NA               | NA                              | Yes                                                                                                                                         |
| Generation R       | Birth weight    | 7                                  | 6.4 (2.4)     | (0.8, 12.9)      | GWAS, Illumina 610 Quad and 660 platforms                                            | 98%              | 0.41/>1e-6       | 0.71/>1e-6        | 0.49/>1e-6       | 0.27/>1e-6         | 0.30/>1e-6         | 0.72/>1e-6       | 0.24/>1e-6                      | Yes                                                                                                                                         |
| YFS                | T2D             | 7                                  | 4.3 (2.4)     | (0.9, 10.8)      | custom Illumina BeadChip Human670K                                                   | 95%              | 0.39/0.78        | 0.22/0.73         | 0.61/0.43        | 0.44/0.82          | 0.41/0.71          | 0.40/0.50        | 0.32/0.99                       | Yes                                                                                                                                         |
| MESA               | T2D             | 7                                  | NA            | NA               | NA                                                                                   | NA               | NA               | NA                | NA               | NA                 | NA                 | NA               | NA                              | Yes                                                                                                                                         |
| MDC                | T2D             | 7                                  | 6.5 (2.4)     | (0.7, 12.6)      | Illumina HumanOmniExpress BeadChip                                                   | 100%             | 0.42/0.67        | 0.74/0.10         | 0.47/0.60        | 0.27/0.04          | 0.31/0.20          | 0.71/0.43        | 0.27/0.85                       | Yes                                                                                                                                         |
| WGHS               | T2D             | 7                                  | 6.6(5.4-7.8)  | (0.02, 13.2)     | Illumina HumanHap300 Duo "+"                                                         | >90%             | 0.41/0.40        | 0.75/0.99         | 0.49/0.98        | 0.26/0.96          | 0.29/0.47          | 0.73/0.99        | 0.28/0.90                       | Yes                                                                                                                                         |
| THISEAS            | T2D             | 7                                  | NA            | NA               | NA                                                                                   | NA               | NA               | NA                | NA               | NA                 | NA                 | NA               | NA                              | Yes                                                                                                                                         |
| DGDG               | T2D             | 7                                  | 6.8 (2.5)     | (1.2, 12.5)      | Illumina HAP300 or imputation (IMPUTE2 certainty >0.98, calling if probability >0.8) | 97%              | 0.42/0.06        | 0.76/0.07         | 0.52/1.00        | 0.26/0.14          | 0.27/0.45          | 0.73/0.29        | 0.26/0.32                       | Yes                                                                                                                                         |
| PREDIME D-Valencia | T2D             | 7                                  | 5.82          | (1.46, 12.09)    | Illumina Omni Express array                                                          | 97%              | 0.41/0.529       | 0.82/0.784        | 0.57/0.554       | 0.14/0.791         | 0.17/0.175         | 0.60/0.053       | 0.17/0.173                      | Yes                                                                                                                                         |
| LIFE-Heart         | T2D             | 7                                  | 6.8 (5.5-8.0) | (0.9, 13.0)      | Affymetrix Axiom-CADLIFE array + Imputation                                          | 97%              | 0.44/0.96        | 0.77/0.23         | 0.48/0.89        | 0.28/0.22          | 0.29/0.61          | 0.74/0.63        | 0.27/0.86                       | Yes                                                                                                                                         |
| LIFE-Adult         | T2D             | 7                                  | 6.8 (5.5-8.0) | (0.9, 13.0)      | Affymetrix Axiom-CEU SNP array + Imputation                                          | 97%              | 0.44/0.64        | 0.77/0.71         | 0.48/0.71        | 0.29/0.70          | 0.29/0.21          | 0.74/0.077       | 0.27/0.97                       | Yes                                                                                                                                         |
| HELENA             | Birth weight    | 6                                  | 6.3 (2.2)     | (1.7, 10.6)      | KASPAR                                                                               | 100%             | 0.44/0.26        | 0.80/0.98         | 0.55/0.0007      | 0.26/0.06          | 0.28/0.33          | 0.75/0.60        | NA                              | Yes                                                                                                                                         |
| GOLDN              | T2D             | 7                                  | NA            | NA               | NA                                                                                   | NA               | NA               | NA                | NA               | NA                 | NA                 | NA               | NA                              | Yes                                                                                                                                         |
| BPRHS              | T2D             | 7                                  | NA            | NA               | NA                                                                                   | NA               | NA               | NA                | NA               | NA                 | NA                 | NA               | NA                              | Yes                                                                                                                                         |
| SWS-W              | Birth weight    | 6                                  | 6.0 (2.2)     | (0.8, 12.0)      | KASP PCR-based (LGC)                                                                 | ≥97%             | 0.41/0.76        | 0.75/0.82         | 0.51/0.52        | 0.25/0.92          | 0.31/0.34          | 0.74/0.55        | Failed to genotype whole sample | Yes                                                                                                                                         |

|                |              |   |              |                     |                                                                                   |                   |                   |              |                 |                 |                 |                   |                                 |     |
|----------------|--------------|---|--------------|---------------------|-----------------------------------------------------------------------------------|-------------------|-------------------|--------------|-----------------|-----------------|-----------------|-------------------|---------------------------------|-----|
| SWS-C          | Birth weight | 6 | 5.9 (2.3)    | (1.5, 11.3)         | KASP PCR-based (LGC)                                                              | ≥97%              | 0.39/0.10         | 0.74/0.41    | 0.51/0.13       | 0.26/0.61       | 0.31/0.35       | 0.75/0.03         | Failed to genotype whole sample | Yes |
| LISA/GIN I     | Birth weight | 7 | 6.7 (2.6)    | (0.9, 12.1)         | Affy5/Affy6 (those with 100% genotyped; <100% imputed)                            | ≥98%              | 0.42/0.09         | 0.78/0.76    | 0.5/1           | 0.27/0.90       | 0.29/0.76       | 0.74/0.95         | 0.27/0.27                       | Yes |
| SCORM          | Birth weight |   | NA           | NA                  | NA                                                                                | NA                | NA                | NA           | NA              | NA              | NA              | NA                | NA                              | Yes |
| STRIP          | Birth weight | 7 | 6.41 (2.31)  | (2.15, 11.77)       | MetaboChip                                                                        | 90%               | 0.337/0.93        | 0.823/0.582  | 0.466/0.235     | 0.317/0.450     | 0.325/0.877     | 0.647/0.223       | 0.243/0.665                     | Yes |
| CLHNS          | T2D          | 7 | 8.3 (1.0)    | (3.2, 13.3)         | Affy 5.0                                                                          | 97%               | 0.484/0.57        | 0.993/0.0018 | 0.822/0.60      | 0.408/0.61      | 0.377/0.21      | 0.680/0.89        | 0.255/0.98                      | Yes |
| Rotterdam      | T2D          | 7 | 7.1 (2.5)    | (0.9, 13.2)         | Illumina Infinium Human Hap 550K                                                  | >95%              | 0.411/0.947       | 0.720/0.825  | 0.482/0.994     | 0.264/0.842     | 0.300/0.967     | 0.727/0.933       | 0.261/0.842                     | Yes |
| NEO            | T2D          | 7 | 6.37 (2.41)  | 12.16 (0.85, 13.01) | Illumina HumanCoreExome chip                                                      | 100%              | 0.41/0.40         | 0.72/0.44    | 0.46/0.27       | 0.27/0.30       | 0.29/0.84       | 0.71/0.20         | 0.26/0.95                       | Yes |
| CHOP           | BW           | 7 | 7.8 (2.2)    | (1.9, 12.3)         | Human OmniExpress-24 v1.0                                                         | 97%               | 0.44/0.535        | 0.81/0.328   | 0.570/0.038     | 0.72/0.898      | 0.26/0.894      | 0.73/0.092        | 0.29/0.902                      | Yes |
| WHI            | T2D          | 7 | NA           | NA                  | NA                                                                                | NA                | NA                | NA           | NA              | NA              | NA              | NA                | NA                              | Yes |
| YH2000         | Birth weight | 6 | 5.7 (2.2)    | (2, 9.7)            | KASPAR                                                                            | 100%              | 0.34/0.019        | 0.71/0.29    | 0.47/0.27       | 0.26/0.69       | 0.33/0.45       | 0.75/0.41         | NA                              | Yes |
| YH3            | Birth weight | 6 | 5.8 (2.3)    | (1.2, 9.7)          | KASPAR                                                                            | 100%              | 0.36/0.78         | 0.76/0.14    | 0.44/0.018      | 0.25/0.36       | 0.34/0.20       | 0.74/0.13         | NA                              | Yes |
| DF-TJ          | T2D          | 7 | 8.4 (2.3)    | (3.1, 13.2)         | Affymetrix 6.0                                                                    | 99.4%             | 0.52/0.60         | 1.00/0.93    | 0.80/0.03       | 0.50/0.10       | 0.42/0.91       | 0.51/0.57         | 0.24/0.45                       | Yes |
| HCS            | T2D          | 6 | 6.0 (2.3)    | (0.7, 11.2)         | KASP Allele specific PCR                                                          | 100%              | 0.40/0.97         | 0.73/0.81    | 0.51/0.94       | 0.27/0.94       | 0.29/0.97       | 0.74/0.90         | NA                              | Yes |
| 1958BC         | T2D          | 7 | 6.5 (2.5)    | (0.9, 12.2)         | Affymetrix 6.0 or Illumina Infinium 550K                                          | ≥ 95%             | 0.39/0.78         | 0.73/0.20    | 0.50/0.55       | 0.27/0.08       | 0.31/0.71       | 0.74/0.75         | 0.24/0.09                       | Yes |
| Biobank Japan  | T2D          | 7 | 7.88 (2.33)  | (2.40, 13.34)       | Imputation (Cases and controls were genotyped by Illumina Human610-Quad BeadChip) | 100% (imputation) | 0.496/-           | 1.000/-      | 0.726/-         | 0.467/-         | 0.365/-         | 0.505/-           | 0.193/-                         | Yes |
| LURIC          | T2D          | 7 | 6.8 (2.4)    | (1.7, 12.3)         | Microarray                                                                        | 100%              | 0.42/0.45         | 0.77/0.68    | 0.48/0.88       | 0.26/0.56       | 0.27/1.00       | 0.76/1.00         | 0.28/0.72                       | Yes |
| ARIC-EA        | T2D          | 7 | 7.5 (2.4)    | (1.5, 13.3)         | Imputed                                                                           | NA                | 0.41/0.9313       | 0.75/0.9494  | 0.49/0.9996     | 0.27/0.9926     | 0.29/0.9997     | 0.74/0.9985       | 0.27/0.9743                     | Yes |
| ARIC-AA        | T2D          | 7 | 7.5 (2.3)    | (1.3, 12.5)         | Imputed                                                                           | NA                | 0.25/0.9805       | 0.66/0.8796  | 0.38/0.9992     | 0.24/0.9924     | 0.75/1.000      | 0.71/0.9850       | 0.42/0.8552                     | Yes |
| Bogalusa Study | T2D          | 7 | 6.1 (2.3)    | (0.7, 12.0)         | Illumina Human610 BeadChip                                                        | NA                | 0.41/0.079        | 0.78/0.238   | 0.50/0.080      | 0.28/0.835      | 0.22/0.726      | 0.76/0.507        | 0.27/0.923                      | Yes |
| SIMES          | T2D          | 5 | 6.1(3.0)     | (0,13.004)          | Illumina 610Quad                                                                  | 95%               | 0.410264/0.4      | NA           | NA              | 0.43922/0.243   | 0.319954/0.4747 | 0.712729/0.3485   | 0.275803/0.5488                 | Yes |
| SINDI          | T2D          | 4 | 5.3(3.5)     | (0,12.6)            | Illumina 610Quad                                                                  | 95%               | 0.247119/0.7342   | NA           | NA              | 0.246799/0.9458 | NA              | 0.867798/0.1217   | 0.25128/0.1784                  | Yes |
| DC-SP2-1M      | T2D          | 6 | 7.3(2.7)     | (1.9,13.1)          | Illumina 1M duov3                                                                 | 95%               | 0.534447/0.3633   | NA           | 0.822547/0.9118 | 0.455637/0.948  | 0.425887/0.6441 | 0.577244/0.000991 | 0.253653/0.8644                 | Yes |
| DC-SP2-610     | T2D          | 5 | 6.3(3.1)     | (0,13.4)            | Illumina 610Quad                                                                  | 95%               | 0.538662/0.5534   | NA           | NA              | 0.459166/0.1728 | 0.383579/0.8517 | 0.573414/1        | 0.254996/0.7563                 | Yes |
| SCES           | T2D          | 5 | 6.531(3.193) | (0,13.004)          | Illumina 610Quad                                                                  | 0.95              | 0.540262/0.002532 | NA           | NA              | 0.475655/0.3399 | 0.396692/0.9169 | 0.567104/0.6111   | 0.252497/1                      | Yes |
| CHS            | T2D          | 7 | 6.8 (2.5)    | 0.9, 12.6           | Illumina HumanCNV370-Duo BeadChip and imputation to HapMap                        |                   | 0.42              | 0.75         | 0.52            | 0.27            | 0.3             | 0.74              | 0.29                            | Yes |
| SCHS           | T2D          | 6 | 6.7(3.1)     | (0,12.4)            | Illumina 610Quad                                                                  | 95%               | NA                | NA           | NA              | NA              | NA              | NA                | NA                              | Yes |

**eTable 5. Distribution of genotypes of included 7 SNPs in the CHARGE-BIG study**

| Short name      | rs900400      |               |               | rs9883204     |               |               | rs1042725     |               |               | rs6931514      |                |                | rs4432842       |                 |                 | rs724577      |               |               | rs1801253            |                      |                      |
|-----------------|---------------|---------------|---------------|---------------|---------------|---------------|---------------|---------------|---------------|----------------|----------------|----------------|-----------------|-----------------|-----------------|---------------|---------------|---------------|----------------------|----------------------|----------------------|
|                 | CCNL1<br>0, % | CCNL1<br>1, % | CCNL1<br>2, % | ADCY5<br>0, % | ADCY5<br>1, % | ADCY5<br>2, % | HMGA2<br>0, % | HMGA2<br>1, % | HMGA2<br>2, % | CDKAL1<br>0, % | CDKAL1<br>1, % | CDKAL1<br>2, % | 5q11.2 0<br>, % | 5q11.2 1<br>, % | 5q11.2 2<br>, % | LCORL<br>0, % | LCORL<br>1, % | LCORL<br>2, % | ADR<br>BI<br>0,<br>% | ADR<br>BI<br>1,<br>% | ADR<br>BI<br>2,<br>% |
| NHS             | 34.9          | 47.5          | 17.6          | 6.0           | 37.0          | 57.0          | 25.6          | 49.8          | 24.7          | 53.1           | 39.2           | 7.7            | 50.0            | 41.1            | 8.9             | 7.1           | 38.2          | 54.8          | 52.3                 | 40.2                 | 7.5                  |
| HPFS            | 33.6          | 48.7          | 17.7          | 6.2           | 36.1          | 57.7          | 23.4          | 49.1          | 27.5          | 52.8           | 39.9           | 7.3            | 53.6            | 38.1            | 8.3             | 6.3           | 37.9          | 55.8          | 51.2                 | 39.9                 | 8.9                  |
| DCH             | 35.7          | 48.4          | 16.0          | 7.4           | 37.6          | 55.0          | 27.6          | 49.8          | 22.6          | 50.1           | 41.9           | 8.0            | 63.3            | 32.4            | 4.3             | 6.7           | 40.2          | 53.2          | 54.1                 | 39.5                 | 6.4                  |
| GOYA            | 37.3          | 45.7          | 17.0          | 7.9           | 35.8          | 56.3          | 29.3          | 44.8          | 26.0          | 50.8           | 42.2           | 7.0            | 65.1            | 30.4            | 4.6             | 6.4           | 41.3          | 52.4          | 53.9                 | 40.2                 | 5.9                  |
| Raine Study     | 35.8          | 48.8          | 15.4          | 6.0           | 37.3          | 56.7          | 27.7          | 49.0          | 23.3          | 54.7           | 38.0           | 6.6            | 64.4            | 30.5            | 5.2             | 6.5           | 38.0          | 55.5          | 55.3                 | 37.7                 | 7.0                  |
| COPSAC-REGISTRY | 35.4          | 47.3          | 17.3          | 8.4           | 40.6          | 51.0          | 27.5          | 51.6          | 21.0          | 50.6           | 42.8           | 6.6            | 47.3            | 42.8            | 9.9             | 7.2           | 40.6          | 52.2          | 56.6                 | 36.9                 | 6.5                  |
| COPSAC-CHILDREN | 34.0          | 51.4          | 14.6          | 6.4           | 41.6          | 51.9          | 27.6          | 50.0          | 22.4          | 46.9           | 44.4           | 8.7            | 48.2            | 43.6            | 8.3             | 8.7           | 39.9          | 51.4          | 55.9                 | 38.4                 | 5.7                  |
| GESUS           | NA            | NA            | NA            | NA            | NA            | NA            | NA            | NA            | NA            | NA             | NA             | NA             | NA              | NA              | NA              | NA            | NA            | NA            | NA                   | NA                   | NA                   |
| Generation R    | 35.8          | 46.6          | 17.6          | 8.7           | 39.5          | 51.8          | 26.2          | 49.4          | 24.4          | 53.5           | 39.1           | 7.4            | 48.9            | 41.3            | 9.8             | 7.9           | 40.2          | 51.9          | 56.9                 | 36.8                 | 6.3                  |
| YFS             | 48.2          | 42.4          | 9.4           | 65.5          | 30.7          | 3.8           | 28.8          | 49.0          | 22.2          | 44.7           | 44.7           | 11.7           | 46.7            | 43.2            | 10.1            | 46.4          | 42.6          | 11.1          | 54.7                 | 38.8                 | 6.6                  |
| MESA            | 37.7          | 46.1          | 16.2          | 7.8           | 34.7          | 57.5          | 23.1          | 46.9          | 30.1          | 51.6           | 39.0           | 9.4            | 31.8            | 41.8            | 26.4            | 10.1          | 42.2          | 47.7          | 9.6                  | 41.2                 | 49.2                 |
| MDC             | 36.1          | 47.7          | 16.2          | 6.6           | 38.1          | 55.3          | 28.7          | 49.9          | 21.4          | 52.4           | 39.8           | 7.8            | 47.8            | 42.8            | 9.3             | 7.7           | 40.0          | 52.2          | 53.6                 | 38.8                 | 7.6                  |
| WGHS            | 34.1          | 48.7          | 17.2          | 6.1           | 37.7          | 56.1          | 25.9          | 49.5          | 24.6          | 54.4           | 38.6           | 7.0            | 49.5            | 41.9            | 8.7             | 7.2           | 38.6          | 54.3          | 52.4                 | 39.9                 | 7.6                  |
| THISEAS         | 30.8          | 48.3          | 20.9          | 3.3           | 32.7          | 63.9          | 14.8          | 47.4          | 37.8          | 53.1           | 39.2           | 7.7            | 53.7            | 38.6            | 7.7             | 4.4           | 32.8          | 62.8          | 49.1                 | 41.3                 | 9.6                  |
| DGDG            | 34.4          | 48.3          | 17.3          | 6.6           | 32.7          | 60.7          | 20.9          | 49.7          | 29.4          | 52.1           | 37.3           | 10.5           | 52.9            | 39.5            | 7.6             | 5.5           | 39.9          | 54.6          | 50.2                 | 39.8                 | 7.0                  |
| PREDIMED        | 34.7          | 49.2          | 16.1          | 3.5           | 29.8          | 66.6          | 18.4          | 50.0          | 31.5          | 73.2           | 24.8           | 2.0            | 68.5            | 29.2            | 2.2             | 14.6          | 50.9          | 34.5          | 68.5                 | 29.3                 | 2.3                  |
| LIFE-Heart      | 30.9          | 49.4          | 19.7          | 5.6           | 34.9          | 59.5          | 27.0          | 50.0          | 29.9          | 51.6           | 40.0           | 8.4            | 49.9            | 41.3            | 8.8             | 6.7           | 37.9          | 55.4          | 54.1                 | 38.9                 | 7.1                  |
| LIFE-Adult      | 31.4          | 48.9          | 19.6          | 5.2           | 34.9          | 59.8          | 26.7          | 50.3          | 23.0          | 50.2           | 41.5           | 8.3            | 49.7            | 42.1            | 8.2             | 7.2           | 37.2          | 55.6          | 52.8                 | 39.7                 | 7.5                  |
| HELENA          | 33.0          | 48.0          | 19.0          | 4.0           | 32.0          | 64.0          | 23.0          | 44.0          | 33.0          | 54.0           | 40.0           | 6.0            | 51.0            | 42.0            | 7.0             | 6.0           | 37.0          | 57.0          | NA                   | NA                   | NA                   |
| GOLDN           | 37.5          | 46.6          | 15.9          | 60.1          | 34.1          | 5.9           | 26.9          | 47.0          | 26.1          | 8.1            | 43.1           | 48.8           | 51.2            | 40.3            | 8.5             | 55.6          | 37.4          | 7.1           | 6.0                  | 42.7                 | 51.3                 |



|                        |      |      |      |      |      |      |      |      |      |      |      |      |      |      |      |      |      |      |      |      |      |
|------------------------|------|------|------|------|------|------|------|------|------|------|------|------|------|------|------|------|------|------|------|------|------|
| BPRHS                  | 17.1 | 43.9 | 39.1 | 53.1 | 39.3 | 7.6  | 19.1 | 48.6 | 32.2 | 57.5 | 35.0 | 7.5  | 28.6 | 44.2 | 27.2 | 9.7  | 41.7 | 48.6 | 48.6 | 41.5 | 9.9  |
| SWS-W                  | 35.0 | 48.0 | 17.0 | 6.0  | 38.0 | 56.0 | 23.0 | 51.0 | 26.0 | 56.0 | 38.0 | 6.0  | 49.0 | 42.0 | 10.0 | 6.0  | 38.0 | 56.0 | 57.0 | 38.0 | 4.0  |
| SWS-C                  | 38.0 | 46.0 | 16.0 | 6.0  | 39.0 | 54.0 | 23.0 | 52.0 | 26.0 | 54.0 | 39.0 | 7.0  | 48.0 | 42.0 | 10.0 | 5.0  | 40.0 | 55.0 | 57.0 | 36.0 | 7.0  |
| LISA/GINI              | 35.0 | 46.3 | 18.7 | 4.6  | 34.5 | 60.9 | 25.8 | 49.7 | 24.5 | 53.4 | 39.0 | 7.6  | 49.8 | 41.6 | 8.6  | 7.3  | 38.3 | 55.0 | 52.1 | 40.6 | 7.3  |
| SCORM                  | NA   | NA   | NA   | NA   | NA   | NA   | NA   | NA   | NA   | NA   | NA   | NA   | NA   | NA   | NA   | NA   | NA   | NA   | NA   | NA   | NA   |
| STRIP                  | 43.8 | 43.8 | 11.3 | 2.8  | 29.7 | 67.5 | 29.7 | 47.3 | 23.0 | 45.9 | 44.7 | 9.4  | 45.4 | 44.2 | 10.4 | 11.3 | 48.0 | 40.7 | 57.6 | 36.2 | 6.3  |
| CLHNS                  | 27.0 | 49.3 | 23.7 | 0.1  | 1.3  | 98.7 | 3.3  | 28.9 | 67.8 | 34.8 | 47.9 | 17.3 | 38.0 | 48.4 | 13.6 | 10.1 | 43.6 | 46.3 | 55.5 | 38.0 | 6.5  |
| Rotterdam              | 16.3 | 49.7 | 34.0 | 7.7  | 40.4 | 51.9 | 26.8 | 50.0 | 23.2 | 7.0  | 39.0 | 54.0 | 8.9  | 42.1 | 49.0 | 7.2  | 40.2 | 52.6 | 6.9  | 38.5 | 54.7 |
| NEO                    | 34.7 | 49.1 | 16.2 | 7.5  | 41.0 | 51.5 | 28.2 | 50.8 | 21.0 | 53.8 | 38.5 | 7.6  | 49.7 | 41.8 | 8.5  | 8.8  | 40.1 | 51.0 | 55.5 | 37.9 | 6.6  |
| CHOP                   | 30.4 | 51.2 | 18.4 | 2.9  | 33.4 | 63.7 | 16.1 | 54.7 | 29.3 | 7.3  | 40.7 | 52.1 | 55.2 | 37.8 | 7.0  | 8.8  | 36.0 | 55.2 | 50.7 | 41.3 | 8.1  |
| WHI                    | NA   | NA   | NA   | NA   | NA   | NA   | NA   | NA   | NA   | NA   | NA   | NA   | NA   | NA   | NA   | NA   | NA   | NA   | NA   | NA   | NA   |
| YHS2000                | 39.0 | 53.0 | 8.0  | 8.0  | 41.0 | 51.0 | 26.0 | 54.0 | 20.0 | 55.0 | 40.0 | 5.0  | 44.0 | 44.0 | 12.0 | 6.0  | 39.0 | 55.0 | NA   | NA   | NA   |
| YHS3                   | 41.0 | 47.0 | 13.0 | 5.0  | 38.0 | 57.0 | 28.0 | 54.0 | 18.0 | 56.0 | 39.0 | 5.0  | 41.0 | 47.0 | 12.0 | 9.0  | 33.0 | 58.0 | NA   | NA   | NA   |
| Dongfeng-Tongji Cohort | 22.5 | 49.1 | 27.4 | 0.0  | 0.8  | 99.2 | 3.2  | 31.8 | 65.1 | 22.0 | 52.3 | 23.0 | 32.3 | 48.9 | 18.7 | 23.9 | 50.1 | 25.5 | 53.2 | 40.0 | 6.8  |
| HCS                    | 34.8 | 49.2 | 16.0 | 7.7  | 37.7 | 54.6 | 24.2 | 49.8 | 26.0 | 52.7 | 40.2 | 7.1  | 51.0 | 40.6 | 8.4  | 5.8  | 40.1 | 54.1 | NA   | NA   | NA   |
| 1958BC                 | 37.3 | 47.4 | 15.3 | 7.1  | 40.6 | 52.2 | 25.2 | 50.4 | 24.3 | 53.6 | 38.5 | 7.9  | 47.6 | 42.9 | 9.4  | 6.6  | 37.8 | 55.7 | 57.3 | 37.4 | 5.3  |
| Biobank Japan          | NA   | NA   | NA   | NA   | NA   | NA   | NA   | NA   | NA   | NA   | NA   | NA   | NA   | NA   | NA   | NA   | NA   | NA   | NA   | NA   | NA   |
| LURIC                  | 33.0 | 48.1 | 19.0 | 5.3  | 36.1 | 58.5 | 24.1 | 51.1 | 24.9 | 48.5 | 42.6 | 8.9  | 51.2 | 40.8 | 7.9  | 7.0  | 37.6 | 55.4 | 53.2 | 39.0 | 7.8  |
| ARIC-EA                | 35.0 | 47.8 | 17.2 | 6.3  | 36.1 | 57.5 | 24.1 | 49.9 | 26.0 | 7.4  | 39.1 | 53.5 | 49.4 | 41.8 | 8.8  | 54.9 | 38.3 | 6.8  | 7.6  | 40.1 | 52.3 |
| ARIC-AA                | 56.3 | 39.2 | 4.5  | 10.4 | 44.6 | 45.0 | 13.6 | 47.3 | 39.2 | 5.2  | 40.8 | 53.9 | 7.2  | 37.5 | 55.3 | 52.4 | 40.4 | 7.2  | 18.5 | 50.6 | 30.9 |
| Bogalusa Study         | 33.4 | 51.7 | 14.9 | 60.3 | 35.7 | 4.0  | 23.8 | 53.5 | 22.8 | 52.3 | 39.7 | 7.9  | 4.7  | 35.1 | 60.3 | 5.3  | 37.8 | 56.9 | 52.5 | 40.1 | 7.4  |
| SIMES                  | 33.3 | 49.9 | 16.8 | NA   | NA   | NA   | NA   | NA   | NA   | 31.7 | 31.7 | 20.3 | 46.6 | 42.8 | 10.6 | 8.7  | 39.9 | 51.4 | 53.0 | 39.0 | 8.0  |
| SINDI                  | 56.8 | 36.8 | 6.4  | NA   | NA   | NA   | NA   | NA   | NA   | 56.2 | 56.2 | 6.9  | NA   | NA   | NA   | 2.0  | 21.1 | 76.9 | 56.5 | 36.6 | 6.9  |
| SP2-SDCS-1M            | 20.8 | 49.8 | 29.4 | NA   | NA   | NA   | 3.2  | 28.0 | 68.8 | 28.0 | 28.0 | 22.1 | 33.4 | 49.1 | 17.5 | 17.1 | 51.7 | 31.2 | 57.3 | 36.3 | 6.5  |
| SP2-SDCS-610           | 22.1 | 48.9 | 29.1 | NA   | NA   | NA   | NA   | NA   | NA   | 27.8 | 27.8 | 22.6 | 38.7 | 46.7 | 14.7 | 18.2 | 48.5 | 33.3 | 55.1 | 38.3 | 6.7  |
| SCES                   | NA   | NA   | NA   | NA   | NA   | NA   | NA   | NA   | NA   | NA   | NA   | NA   | NA   | NA   | NA   | NA   | NA   | NA   | NA   | NA   | NA   |
| CHS                    | 33.5 | 49.1 | 17.4 | 6.2  | 35.7 | 58.1 | 22.8 | 49.3 | 27.8 | 53.0 | 39.8 | 7.2  | 50.4 | 40.7 | 8.9  | 6.7  | 38.0 | 55.3 | 51.0 | 40.5 | 8.6  |
| SCHS                   | 28.2 | 49.9 | 21.9 | NA   | NA   | NA   | 71.9 | 25.4 | 2.7  | 21.9 | 49.4 | 28.7 | 36.2 | 47.4 | 16.4 | 18.5 | 48.7 | 32.8 | 56.7 | 37.3 | 6.0  |

**eTable 6. Associations between seven loci associated with birth weight and various anthropometric measures taken at birth (data from summary results)**

|              |                  |                            | <b>Birth weight (combined meta-analysis of European Discovery and Follow-up studies) [in grams]</b> |                |
|--------------|------------------|----------------------------|-----------------------------------------------------------------------------------------------------|----------------|
| <b>Locus</b> | <b>Index SNP</b> | <b>allele/Other allele</b> | <b>Beta (SE)</b>                                                                                    | <b>P-value</b> |
| CCNL1        | rs900400         | C/T                        | -0.072 (0.006)                                                                                      | 3.6E-38        |
| ADCY5        | rs9883204        | C/T                        | -0.059 (0.006)                                                                                      | 5.5E-20        |
| HMGA2        | rs1042725        | T/C                        | -0.047 (0.005)                                                                                      | 1.4E-19        |
| CDKAL1       | rs6931514        | G/A                        | -0.050 (0.006)                                                                                      | 1.5E-18        |
| 5q11.2       | rs4432842        | C/T                        | -0.034 (0.006)                                                                                      | 0.000000046    |
| LCORL        | rs724577         | C/A                        | -0.042 (0.006)                                                                                      | 4.6E-11        |
| ADRB1        | rs1801253        | G/C                        | -0.041 (0.007)                                                                                      | 3.6E-09        |

Results are from inverse variance, fixed-effects meta-analysis of all available study samples of European ancestry. The effect allele for each SNP is labelled on the positive strand according to HapMap. The beta value is the change in trait z score per birth weight-lowering allele from linear regression, adjusted for sex and gestational age (where available), assuming an additive genetic model. To obtain the equivalent birth weight effect in grams, we multiplied by 484g, the median birth weight standard deviation of European studies in 2. There was little detectable heterogeneity between studies (all  $P > 0.01$ ).

\*Results are unadjusted for maternal genotype or birth length, but only in samples where maternal genotype or birth length is available (for direct comparison with the model that is adjusted for maternal genotype or birth length, respectively.)

The  $\beta$  value is the change in z score per birth weight-lowering allele from linear regression, adjusted for sex and gestational age (where available), assuming an additive genetic model. To obtain the equivalent birth weight effect in grams, we multiplied by 484 g, the median birth weight standard deviation of European studies.

Reference: EGG consortium, 2013, Nature Genetic

**eTable 7. Genetic association of birth weight genetic variants with glycemic traits (data from summary results).**

| SNPs      | Gene   | Effect Allele | Other Allele | HbA1c, % |        |         | Fasting insulin, log (pmol/L) |        |         | T2DM    |        |         | Fasting glucose, mmol/L |        |         | 2h glucose, mmol/L |        |         |
|-----------|--------|---------------|--------------|----------|--------|---------|-------------------------------|--------|---------|---------|--------|---------|-------------------------|--------|---------|--------------------|--------|---------|
|           |        |               |              | Beta     | SE     | P-value | Beta                          | SE     | P-value | Beta    | SE     | P-value | Beta                    | SE     | P-value | Beta               | SE     | P-value |
| rs1042725 | HMGA2  | C             | T            | -0.0005  | 0.0034 | 0.886   | -0.0023                       | 0.0038 | 0.537   | -0.0392 | 0.0123 | 0.004   | -0.0008                 | 0.0036 | 0.819   | -0.0200            | 0.0180 | 0.280   |
| rs1801253 | ADRB1  | C             | G            | 0.0002   | 0.0042 | 0.969   | 0.0025                        | 0.0047 | 0.599   | -0.0488 | 0.0168 | 0.003   | -0.0056                 | 0.0045 | 0.213   | 0.0019             | 0.0230 | 0.932   |
| rs4432842 | 5q11.2 | T             | C            | -0.0028  | 0.0037 | 0.453   | 0.0003                        | 0.0042 | 0.940   | 0.0100  | 0.0126 | 0.560   | -0.0070                 | 0.0040 | 0.080   | -0.0052            | 0.0200 | 0.799   |
| rs6931514 | CDKAL1 | A             | G            | -0.0173  | 0.0038 | 0.000   | 0.0110                        | 0.0042 | 0.010   | -0.1484 | 0.0153 | 0.000   | -0.0096                 | 0.0041 | 0.019   | -0.0420            | 0.0210 | 0.053   |
| rs724577  | LCORL  | A             | C            | -0.0038  | 0.0038 | 0.319   | -0.0089                       | 0.0043 | 0.037   | -0.0296 | 0.0148 | 0.027   | -0.0074                 | 0.0041 | 0.069   | -0.0420            | 0.0200 | 0.041   |
| rs900400  | CCNL1  | T             | C            | -0.0025  | 0.0035 | 0.485   | -0.0052                       | 0.0041 | 0.206   | -0.0198 | 0.0149 | 0.210   | -0.0035                 | 0.0040 | 0.371   | 0.0320             | 0.0200 | 0.109   |
| rs9883204 | ADCY5  | T             | C            | -0.0100  | 0.0041 | 0.014   | 0.0017                        | 0.0047 | 0.721   | -0.0953 | 0.0185 | 0.000   | -0.0240                 | 0.0045 | 0.000   | -0.0970            | 0.0230 | 0.000   |

**eTable 8. Sixty loci associated with birth weight ( $P < 5 \times 10^{-8}$ ) in European ancestry and/or trans-ancestry (data from summary results).**

| Locus              | SNP        | Proxy SNP  | Chr. | Alleles      |  | EAF  | European ancestry   |                       | Trans-ancestry |                       |
|--------------------|------------|------------|------|--------------|--|------|---------------------|-----------------------|----------------|-----------------------|
|                    |            |            |      | Effect/Other |  |      | $\beta$ (SE) per SD | P-value               | $\beta$ (SE)   | P-value               |
| <i>MTNR1B</i>      | rs10830963 | rs10830963 | 11   | G/C          |  | 0.27 | 0.023 (0.004)       | 2.9x10 <sup>-8</sup>  | 0.022 (0.004)  | 1.0x10 <sup>-7</sup>  |
| <i>APOLD1</i>      | rs11055034 | rs11055034 | 12   | C/A          |  | 0.73 | 0.022 (0.004)       | 1.8x10 <sup>-7</sup>  | 0.023 (0.004)  | 2.3x10 <sup>-8</sup>  |
| <i>SLC45A4</i>     | rs12543725 | rs12543725 | 8    | G/A          |  | 0.6  | 0.023 (0.004)       | 1.2x10 <sup>-9</sup>  | 0.022 (0.004)  | 1.9x10 <sup>-9</sup>  |
| <i>ITPR2</i>       | rs12823128 | rs12823128 | 12   | T/C          |  | 0.56 | 0.021 (0.004)       | 1.9x10 <sup>-8</sup>  | 0.020 (0.004)  | 3.2x10 <sup>-8</sup>  |
| <i>ANK1-NKX6-3</i> | rs13266210 | rs13266210 | 8    | A/G          |  | 0.79 | 0.031 (0.005)       | 1.3x10 <sup>-11</sup> | 0.030 (0.004)  | 1.6x10 <sup>-11</sup> |
| <i>CCNL1-LEKRI</i> | rs13322435 | rs13322435 | 3    | A/G          |  | 0.59 | 0.053 (0.004)       | 3.7x10 <sup>-11</sup> | 0.052 (0.004)  | 1.3x10 <sup>-12</sup> |
| <i>KREMEN1</i>     | rs134594   | rs134594   | 22   | C/T          |  | 0.35 | 0.023 (0.004)       | 1.0x10 <sup>-8</sup>  | 0.022 (0.004)  | 2.2x10 <sup>-8</sup>  |
| <i>HMGA2</i>       | rs1351394  | rs1351394  | 12   | T/C          |  | 0.48 | 0.044 (0.004)       | 1.9x10 <sup>-32</sup> | 0.043 (0.004)  | 2.0x10 <sup>-33</sup> |
| <i>EPAS1</i>       | rs1374204  | rs1374204  | 2    | T/C          |  | 0.7  | 0.047 (0.004)       | 6.2x10 <sup>-29</sup> | 0.046 (0.004)  | 1.5x10 <sup>-29</sup> |
| <i>L3MBTL3</i>     | rs1415701  | rs1415701  | 6    | G/A          |  | 0.73 | 0.025 (0.004)       | 2.6x10 <sup>-9</sup>  | 0.027 (0.004)  | 4.0x10 <sup>-11</sup> |
| <i>LPAR1</i>       | rs2150052  | rs2150052  | 9    | T/A          |  | 0.5  | 0.021 (0.004)       | 2.2x10 <sup>-8</sup>  | 0.020 (0.004)  | 2.8x10 <sup>-8</sup>  |
| <i>NRIP1</i>       | rs2229742  | rs2229742  | 21   | G/C          |  | 0.87 | 0.036 (0.006)       | 2.2x10 <sup>-9</sup>  | 0.034 (0.006)  | 1.5x10 <sup>-8</sup>  |
| <i>PTHIR</i>       | rs2242116  | rs2242116  | 3    | A/G          |  | 0.39 | 0.022 (0.004)       | 1.4x10 <sup>-8</sup>  | 0.021 (0.004)  | 1.2x10 <sup>-8</sup>  |
| <i>LINC00332</i>   | rs2324499  | rs2324499  | 13   | G/C          |  | 0.67 | 0.022 (0.004)       | 7.3x10 <sup>-8</sup>  | 0.023 (0.004)  | 8.3x10 <sup>-9</sup>  |

|                      |             |             |    |     |      |               |                       |               |                       |
|----------------------|-------------|-------------|----|-----|------|---------------|-----------------------|---------------|-----------------------|
| <i>PLEKHA1</i>       | rs2421016   | rs2421016   | 10 | T/C | 0.48 | 0.021 (0.004) | 1.8x10 <sup>-8</sup>  | 0.021 (0.004) | 6.1x10 <sup>-9</sup>  |
| <i>ZBTB7B</i>        | rs3753639   | rs3753639   | 1  | C/T | 0.23 | 0.031 (0.004) | 7.3x10 <sup>-12</sup> | 0.031 (0.004) | 1.3x10 <sup>-12</sup> |
| <i>MAFB</i>          | rs6016377   | rs6016377   | 20 | T/C | 0.45 | 0.024 (0.004) | 9.5x10 <sup>-10</sup> | 0.024 (0.004) | 3.7x10 <sup>-10</sup> |
| <i>HHIP</i>          | rs6537307   | rs6537307   | 4  | G/A | 0.48 | 0.025 (0.004) | 9.5x10 <sup>-12</sup> | 0.026 (0.004) | 1.3x10 <sup>-12</sup> |
| <i>TBX20</i>         | rs6959887   | rs6959887   | 7  | A/G | 0.61 | 0.023 (0.004) | 1.5x10 <sup>-9</sup>  | 0.021 (0.004) | 1.0x10 <sup>-8</sup>  |
| <i>TRIB1</i>         | rs6989280   | rs6989280   | 8  | G/A | 0.7  | 0.022 (0.004) | 2.2x10 <sup>-7</sup>  | 0.022 (0.004) | 5.0x10 <sup>-8</sup>  |
| <i>STRBP</i>         | rs700059    | rs700059    | 9  | G/A | 0.16 | 0.033 (0.005) | 4.7x10 <sup>-10</sup> | 0.036 (0.005) | 1.2x10 <sup>-12</sup> |
| <i>ADRB1</i>         | rs7076938   | rs7076938   | 10 | T/C | 0.73 | 0.036 (0.004) | 4.7x10 <sup>-18</sup> | 0.035 (0.004) | 4.7x10 <sup>-18</sup> |
| <i>HMGAI</i>         | rs7742369   | rs7742369   | 6  | G/A | 0.19 | 0.028 (0.005) | 1.0x10 <sup>-8</sup>  | 0.027 (0.005) | 1.1x10 <sup>-8</sup>  |
| <i>IGF1</i>          | rs7964361   | rs7964361   | 12 | A/G | 0.08 | 0.039 (0.007) | 4.7x10 <sup>-9</sup>  | 0.038 (0.007) | 9.7x10 <sup>-9</sup>  |
| <i>GNAI2</i>         | rs798489    | rs798489    | 7  | C/T | 0.74 | 0.023 (0.004) | 2.0x10 <sup>-8</sup>  | 0.024 (0.004) | 5.0x10 <sup>-9</sup>  |
| <i>5q11.2</i>        | rs854037    | rs854037    | 5  | A/G | 0.8  | 0.027 (0.005) | 2.2x10 <sup>-8</sup>  | 0.025 (0.005) | 3.5x10 <sup>-8</sup>  |
| <i>LCORL</i>         | rs925098    | rs925098    | 4  | G/A | 0.28 | 0.034 (0.004) | 5.4x10 <sup>-16</sup> | 0.032 (0.004) | 1.3x10 <sup>-15</sup> |
| <i>CPA3</i>          | rs10935733  | rs10935733  | 3  | T/C | 0.42 | 0.022 (0.004) | 9.2x10 <sup>-9</sup>  | 0.023 (0.004) | 6.2x10 <sup>-10</sup> |
| <i>PLAC1</i>         | rs11096402  | rs11096402  | X  | G/A | 0.25 | 0.028 (0.005) | 1.3x10 <sup>-9</sup>  | N/A           | N/A                   |
| <i>IGF2BP3</i>       | rs11765649  | rs11765649  | 7  | T/C | 0.76 | 0.027 (0.004) | 5.8x10 <sup>-10</sup> | 0.026 (0.004) | 1.0x10 <sup>-9</sup>  |
| <i>SP6-SP2</i>       | rs12942207  | rs12942207  | 17 | C/T | 0.3  | 0.022 (0.004) | 5.1x10 <sup>-8</sup>  | 0.024 (0.004) | 3.0x10 <sup>-9</sup>  |
| <i>YKT6-GCK</i>      | rs138715366 | rs138715366 | 7  | C/T | 0.99 | 0.241 (0.023) | 7.2x10 <sup>-26</sup> | 0.244 (0.023) | 1.4x10 <sup>-26</sup> |
| <i>ABCC9</i>         | rs139975827 | rs139975827 | 12 | G/A | 0.63 | 0.025 (0.004) | 1.1x10 <sup>-8</sup>  | 0.022 (0.004) | 1.0x10 <sup>-7</sup>  |
| <i>SUZ12P1-CRLF3</i> | rs144843919 | rs144843919 | 17 | G/A | 0.96 | 0.066 (0.012) | 1.4x10 <sup>-8</sup>  | 0.068 (0.011) | 1.5x10 <sup>-9</sup>  |
| <i>RNF219-AS1</i>    | rs1819436   | rs1819436   | 13 | C/T | 0.87 | 0.033 (0.006) | 6.3x10 <sup>-9</sup>  | 0.033 (0.005) | 1.8x10 <sup>-9</sup>  |
| <i>RBI</i>           | rs2854355   | rs2854355   | 13 | G/A | 0.26 | 0.023 (0.004) | 9.8x10 <sup>-8</sup>  | 0.024 (0.004) | 2.2x10 <sup>-8</sup>  |
| <i>DTL</i>           | rs61830764  | rs61830764  | 1  | A/G | 0.36 | 0.022 (0.004) | 5.6x10 <sup>-8</sup>  | 0.022 (0.004) | 4.5x10 <sup>-8</sup>  |
| <i>SREBF2</i>        | rs62240962  | rs62240962  | 22 | C/T | 0.92 | 0.047 (0.007) | 9.7x10 <sup>-12</sup> | 0.047 (0.007) | 3.7x10 <sup>-2</sup>  |
| <i>MLXIPL</i>        | rs62466330  | rs62466330  | 7  | C/T | 0.07 | 0.049 (0.008) | 1.2x10 <sup>-12</sup> | 0.051 (0.007) | 5.9x10 <sup>-12</sup> |
| <i>FCGR2B</i>        | rs72480273  | rs72480273  | 1  | C/A | 0.17 | 0.031 (0.005) | 8.0x10 <sup>-10</sup> | 0.030 (0.005) | 1.5x10 <sup>-9</sup>  |
| <i>INS-IGF2</i>      | rs72851023  | rs72851023  | 11 | T/C | 0.07 | 0.048 (0.008) | 2.9x10 <sup>-10</sup> | 0.046 (0.007) | 6.8x10 <sup>-10</sup> |
| <i>ATAD2B</i>        | rs7575873   | rs7575873   | 2  | A/G | 0.88 | 0.038 (0.006) | 1.3x10 <sup>-11</sup> | 0.036 (0.006) | 6.2x10 <sup>-11</sup> |
| <i>EBF1</i>          | rs7729301   | rs7729301   | 5  | A/G | 0.72 | 0.024 (0.004) | 1.6x10 <sup>-8</sup>  | 0.025 (0.004) | 1.3x10 <sup>-9</sup>  |
| <i>HIST1H2BE</i>     | rs9379832   | rs9379832   | 6  | A/G | 0.71 | 0.023 (0.004) | 6.6x10 <sup>-8</sup>  | 0.024 (0.004) | 1.2x10 <sup>-8</sup>  |
| <i>NT5C2</i>         | rs74233809  | rs11191582  | 10 | C/T | 0.08 | 0.037 (0.007) | 5.2x10 <sup>-8</sup>  | 0.039 (0.006) | 1.8x10 <sup>-9</sup>  |

|                    |             |            |    |     |      |               |                        |               |                        |
|--------------------|-------------|------------|----|-----|------|---------------|------------------------|---------------|------------------------|
| <i>PEPD</i>        | rs10402712  | rs11667352 | 19 | A/G | 0.27 | 0.022 (0.004) | 4.4x10 <sup>-7</sup>   | 0.023 (0.004) | 2.3x10 <sup>-8</sup>   |
| <i>ACTL9</i>       | rs61154119  | rs11670067 | 19 | T/G | 0.84 | 0.028 (0.005) | 1.1x10 <sup>-7</sup>   | 0.028 (0.005) | 2.3x10 <sup>-8</sup>   |
| <i>ADCY5</i>       | rs11719201  | rs11708067 | 3  | T/C | 0.23 | 0.046 (0.004) | 2.4x10 <sup>-26</sup>  | 0.046 (0.004) | 6.4x10 <sup>-27</sup>  |
| <i>FES</i>         | rs12906125  | rs1894400  | 15 | G/A | 0.69 | 0.023 (0.004) | 1.7x10 <sup>-8</sup>   | 0.023 (0.004) | 1.0x10 <sup>-8</sup>   |
| <i>IGF1R</i>       | rs7402982   | rs2017500  | 15 | A/G | 0.42 | 0.023 (0.004) | 2.3x10 <sup>-9</sup>   | 0.023 (0.004) | 1.1x10 <sup>-9</sup>   |
| <i>JAG1</i>        | rs6040076   | rs2206815  | 20 | C/G | 0.51 | 0.023 (0.004) | 2.0x10 <sup>-9</sup>   | 0.022 (0.004) | 7.2x10 <sup>-9</sup>   |
| <i>CLDN7</i>       | rs113086489 | rs222857   | 17 | T/C | 0.55 | 0.031 (0.004) | 9.1 x10 <sup>-16</sup> | 0.030 (0.004) | 1.3X10 <sup>-15</sup>  |
| <i>HHEX-IDE</i>    | rs61862780  | rs2497306  | 10 | T/C | 0.52 | 0.028 (0.004) | 3.0x10 <sup>-14</sup>  | 0.028 (0.004) | 9.5x10 <sup>-15</sup>  |
| <i>WNT4-ZBTB40</i> | rs2473248   | rs2744728  | 1  | C/T | 0.87 | 0.033 (0.006) | 1.1x10 <sup>-8</sup>   | 0.033 (0.005) | 1.1x10 <sup>-9</sup>   |
| <i>GPR139</i>      | rs1011939   | rs2764742  | 16 | G/A | 0.31 | 0.022 (0.004) | 1.3x10 <sup>-7</sup>   | 0.024 (0.004) | 2.7x10 <sup>-9</sup>   |
| <i>PTCHI</i>       | rs28510415  | rs28446116 | 9  | G/A | 0.09 | 0.056 (0.007) | 1.5x10 <sup>-17</sup>  | 0.053 (0.006) | 4.0x10 <sup>-16</sup>  |
| <i>PHF19</i>       | rs7847628   | rs3933326  | 9  | G/A | 0.67 | 0.023 (0.004) | 1.0x10 <sup>-8</sup>   | 0.023 (0.004) | 5.4x10 <sup>-9</sup>   |
| <i>C20orf203</i>   | rs28530618  | rs6057610  | 20 | A/G | 0.5  | 0.026 (0.004) | 7.7x10 <sup>-12</sup>  | 0.024 (0.004) | 8.4x10 <sup>-11</sup>  |
| <i>CDKALI</i>      | rs35261542  | rs7756992  | 6  | C/A | 0.73 | 0.044 (0.004) | 4.4x10 <sup>-27</sup>  | 0.044 (0.004) | 9.7x10 <sup>-29</sup>  |
| <i>ESR1</i>        | rs1101081   | rs851978   | 6  | C/T | 0.73 | 0.038 (0.004) | 1.6x10 <sup>-19</sup>  | 0.037 (0.004) | 6.1 x10 <sup>-20</sup> |

Sixty loci associated with birth weight ( $P < 5 \times 10^{-8}$ ) in European ancestry meta-analysis of up to 143,677 individuals and/or trans-ancestry meta-analysis of up to 153,781 individuals.

BW was z-score transformed separately in males and females after excluding non-singletons and premature births and adjusting for gestational age where available.

a, Effects (beta values) are aligned to the BW-raising allele.

EAF was obtained from the trans-ancestry meta-analysis, except for *PLAC1*, for which the EAF was obtained from the European ancestry meta-analysis due to lack of X chromosome data from the non-European studies.

Chr., chromosome; bp, base pair; EAF, effect allele frequency; SE, standard error.

The lead SNP (or proxy, EUR  $r^2 > 0.6$ ) at the 60 BW loci was queried in publicly available GWAS meta-analysis datasets or in GWAS result obtained through collaboration<sup>79</sup>. Results were available for 53 of those loci and the extracted z-score (allelic effect/SE) was aligned to the BW-raising allele.

**eTable 9. Genetic association of birth weight related 60 genetic variants with glycemic traits (data from summary results).**

| Genes       | Index SNPs | Proxy SNPs | Ch r. | Effect/Oth er | EA F | BW Europeans |       |           | BW Trans-ethnic results |       |           | Fasting glucose, mmol/L |        |          | Fasting insulin, log (pmol/L) |        |         | HbA1C1, % |        |          | 2hGlu, mmol/L |       |         | T2DM      |           |          |
|-------------|------------|------------|-------|---------------|------|--------------|-------|-----------|-------------------------|-------|-----------|-------------------------|--------|----------|-------------------------------|--------|---------|-----------|--------|----------|---------------|-------|---------|-----------|-----------|----------|
|             |            |            |       |               |      | Beta         | SE    | P-value   | Beta                    | SE    | P-value   | Beta                    | SE     | P-value  | Beta                          | SE     | P-value | Beta      | SE     | P-value  | Beta          | SE    | P-value | Beta      | SE        | P-value  |
| MTNR1B      | rs10830963 | rs10830963 | 11    | G/C           | 0.27 | 0.023        | 0.004 | 2.9x10-8  | 0.022                   | 0.004 | 1.0x10-7  | 0.079                   | 0.0045 | 1.26E-68 | -0.004                        | 0.0047 | 0.3988  | 0.0238    | 0.004  | 2.99E-09 | 0.056         | 0.022 | 0.01172 | 0.0374265 | 0.0071502 | 2.00E-07 |
| APOLD1      | rs11055034 | rs11055034 | 12    | C/A           | 0.73 | 0.022        | 0.004 | 1.8x10-7  | 0.023                   | 0.004 | 2.3x10-8  | 0.0011                  | 0.0043 | 0.7883   | -0.0025                       | 0.0045 | 0.5677  | 0.0006    | 0.0039 | 0.881    | 0.022         | 0.022 | 0.3057  | 0.0086002 | 0.0076437 | 0.34     |
| SLC45A4     | rs12543725 | rs12543725 | 8     | G/A           | 0.6  | 0.023        | 0.004 | 1.2x10-9  | 0.022                   | 0.004 | 1.9x10-9  | 0.0018                  | 0.0039 | 0.6512   | 0.0037                        | 0.004  | 0.3533  | 0.0008    | 0.0036 | 0.8162   | 0.013         | 0.019 | 0.4972  | 0.0086002 | 0.0065189 | 0.23     |
| ITPR2       | rs12823128 | rs12823128 | 12    | T/C           | 0.56 | 0.021        | 0.004 | 1.9x10-8  | 0.02                    | 0.004 | 3.2x10-8  | 0.0003                  | 0.0036 | 0.942    | 0.0009                        | 0.0038 | 0.8026  | 0.0023    | 0.0034 | 0.504    | -0.018        | 0.018 | 0.3339  | 0.0043214 | 0.0065835 | 0.38     |
| ANK1-NKX6-3 | rs13266210 | rs13266210 | 8     | A/G           | 0.79 | 0.031        | 0.005 | 1.3x10-11 | 0.03                    | 0.004 | 1.6x10-11 | 0.0075                  | 0.0046 | 0.09988  | -0.0082                       | 0.0047 | 0.08401 | 0.0128    | 0.0042 | 0.002336 | 0.04          | 0.023 | 0.09011 | 0.0293838 | 0.0082872 | 1.00E-04 |
| CCNL1-LEKR1 | rs13322435 | rs13322435 | 3     | A/G           | 0.59 | 0.053        | 0.004 | 3.7x10-41 | 0.052                   | 0.004 | 1.3x10-42 | 0.0043                  | 0.0041 | 0.2996   | -0.0049                       | 0.0043 | 0.2477  | -0.0022   | 0.0037 | 0.5489   | 0.026         | 0.021 | 0.2222  | 0.0128372 | 0.0064301 | 0.086    |
| KREMEN1     | rs134594   | rs134594   | 22    | C/T           | 0.35 | 0.023        | 0.004 | 1.0x10-8  | 0.022                   | 0.004 | 2.2x10-8  | 0.0009                  | 0.0038 | 0.8162   | -0.0047                       | 0.004  | 0.2383  | -0.0004   | 0.0036 | 0.9107   | 0.0016        | 0.019 | 0.9352  | 0.0128372 | 0.0064301 | 0.021    |
| HMGA2       | rs1351394  | rs1351394  | 12    | T/C           | 0.48 | 0.044        | 0.004 | 1.9x10-32 | 0.043                   | 0.004 | 2.0x10-33 | 0.0004                  | 0.0037 | 0.9053   | 0.0045                        | 0.0038 | 0.2313  | 0.0014    | 0.0034 | 0.7578   | -0.027        | 0.018 | 0.1482  | 0.0128372 | 0.0064301 | 0.044    |
| EPAS1       | rs1374204  | rs1374204  | 2     | T/C           | 0.7  | 0.047        | 0.004 | 6.2x10-29 | 0.046                   | 0.004 | 1.5x10-29 | 0.0071                  | 0.0047 | 0.1275   | 0.0053                        | 0.0049 | 0.2745  | 0.0036    | 0.0044 | 0.4077   | -0.014        | 0.024 | 0.5563  | 0.0128372 | 0.0064301 | 0.065    |
| L3MBTL3     | rs1415701  | rs1415701  | 6     | G/A           | 0.73 | 0.025        | 0.004 | 2.6x10-9  | 0.027                   | 0.004 | 4.0x10-11 | 0.0076                  | 0.0043 | 0.07685  | -0.006                        | 0.0045 | 0.1831  | 0.0019    | 0.0038 | 0.6155   | -0.021        | 0.023 | 0.3466  | 0.0128372 | 0.0064301 | 0.026    |
| LPAR1       | rs2150052  | rs2150052  | 9     | T/A           | 0.5  | 0.021        | 0.004 | 2.2x10-8  | 0.02                    | 0.004 | 2.8x10-8  | -0.003                  | 0.0036 | 0.413    | -0.0017                       | 0.0038 | 0.6558  | 0.0032    | 0.0034 | 0.3466   | 0.018         | 0.018 | 0.33    | 0.0043214 | 0.0054587 | 0.43     |
| NRIP1       | rs2229742  | rs2229742  | 21    | G/C           | 0.87 | 0.036        | 0.006 | 2.2x10-9  | 0.034                   | 0.006 | 1.5x10-8  | 0.0045                  | 0.0063 | 0.4724   | 0.0052                        | 0.0066 | 0.4285  | 0.0007    | 0.0058 | 0.9039   | 0.0059        | 0.031 | 0.8514  | 0.0043214 | 0.0131786 | 0.73     |
| PTH1R       | rs2242116  | rs2242116  | 3     | A/G           | 0.39 | 0.022        | 0.004 | 1.4x10-8  | 0.021                   | 0.004 | 1.2x10-8  | 0.0072                  | 0.004  | 0.0686   | 0.0006                        | 0.0041 | 0.8897  | 0.0008    | 0.0037 | 0.02313  | 0.015         | 0.02  | 0.4411  | 0.0170333 | 0.0053532 | 0.014    |
| LINC00332   | rs2324499  | rs2324499  | 13    | G/C           | 0.67 | 0.022        | 0.004 | 7.3x10-8  | 0.023                   | 0.004 | 8.3x10-9  | 0.0057                  | 0.0045 | 0.1987   | 0.0028                        | 0.0047 | 0.5568  | 0.0108    | 0.004  | 0.007618 | -0.045        | 0.023 | 0.05147 | 0.0086002 | 0.0086938 | 0.29     |
| PLEKHA1     | rs2421016  | rs2421016  | 10    | T/C           | 0.48 | 0.021        | 0.004 | 1.8x10-8  | 0.021                   | 0.004 | 6.1x10-9  | 0.0032                  | 0.0037 | 0.3787   | -0.0015                       | 0.0038 | 0.6857  | 0.0025    | 0.0034 | 0.4565   | -0.025        | 0.019 | 0.1813  | 0.0211893 | 0.0052517 | 1.90E-05 |
| MAFB        | rs6016377  | rs6016377  | 20    | T/C           | 0.45 | 0.024        | 0.004 | 9.5x10-10 | 0.024                   | 0.004 | 3.7x10-10 | 0.008                   | 0.004  | 0.04602  | -0.0091                       | 0.0042 | 0.03002 | 0.0036    | 0.0036 | 0.3165   | 0.0069        | 0.02  | 0.731   | 0.0086002 | 0.0065189 | 0.18     |
| HHIP        | rs6537307  | rs6537307  | 4     | G/A           | 0.48 | 0.025        | 0.004 | 9.5x10-12 | 0.026                   | 0.004 | 1.3x10-12 | 0.0059                  | 0.0037 | 0.1104   | -0.002                        | 0.0038 | 0.6088  | 0.0099    | 0.0035 | 0.004119 | -0.019        | 0.019 | 0.3188  | 0.0043214 | 0.005513  | 0.69     |
| TBX20       | rs6959887  | rs6959887  | 7     | A/G           | 0.61 | 0.023        | 0.004 | 1.5x10-9  | 0.021                   | 0.004 | 1.0x10-8  | 0.003                   | 0.0037 | 0.4111   | 0.0028                        | 0.0039 | 0.4613  | 0.0004    | 0.0035 | 0.9115   | 0.012         | 0.019 | 0.5378  | 0.0043214 | 0.005513  | 0.64     |
| TRIB1       | rs6989280  | rs6989280  | 8     | G/A           | 0.7  | 0.022        | 0.004 | 2.2x10-7  | 0.022                   | 0.004 | 5.0x10-8  | 0.0054                  | 0.0046 | 0.2387   | 0.0005                        | 0.0047 | 0.9064  | 0.0018    | 0.004  | 0.6589   | -0.035        | 0.023 | 0.1211  | 0.0043214 | 0.0065835 | 0.68     |
| STRBP       | rs700059   | rs700059   | 9     | G/A           | 0.16 | 0.033        | 0.005 | 4.7x10-10 | 0.036                   | 0.005 | 1.2x10-12 | 0.0051                  | 0.0052 | 0.326    | -0.01                         | 0.0054 | 0.05566 | 0.0008    | 0.005  | 0.178    | -0.032        | 0.026 | 0.2228  | 0.0253059 | 0.0062728 | 2.00E-04 |
| ADRB1       | rs7076938  | rs7076938  | 10    | T/C           | 0.73 | 0.036        | 0.004 | 4.7x10-18 | 0.035                   | 0.004 | 4.7x10-18 | 0.0054                  | 0.0045 | 0.2303   | 0.0026                        | 0.0046 | 0.5753  | 0.0007    | 0.0042 | 0.8738   | 0.0025        | 0.023 | 0.9124  | 0.0170333 | 0.0063935 | 0.0068   |
| HMGA1       | rs7742369  | rs7742369  | 6     | G/A           | 0.19 | 0.028        | 0.005 | 1.0x10-8  | 0.027                   | 0.005 | 1.1x10-8  | -0.002                  | 0.0053 | 0.7053   | 0.0082                        | 0.0056 | 0.1404  | -0.0064   | 0.0052 | 0.2194   | -0.042        | 0.029 | 0.1436  | 0.0043214 | 0.00878   | 0.63     |
| IGF1        | rs7964361  | rs7964361  | 12    | A/G           | 0.08 | 0.039        | 0.007 | 4.7x10-9  | 0.038                   | 0.007 | 9.7x10-9  | 0.0061                  | 0.0066 | 0.36     | 0.0012                        | 0.0069 | 0.8614  | 0.0089    | 0.0063 | 0.1571   | -0.031        | 0.034 | 0.3573  | 0.0253059 | 0.0114532 | 0.015    |

|             |             |            |    |     |      |       |       |           |       |       |           |        |        |          |        |        |          |        |        |           |        |       |           |           |           |          |
|-------------|-------------|------------|----|-----|------|-------|-------|-----------|-------|-------|-----------|--------|--------|----------|--------|--------|----------|--------|--------|-----------|--------|-------|-----------|-----------|-----------|----------|
| GNA12       | rs798489    | rs798489   | 7  | C/T | 0.74 | 0.023 | 0.004 | 2.0x10-8  | 0.024 | 0.004 | 5.0x10-9  | 0.0004 | 0.0041 | 0.9188   | 0.0016 | 0.0043 | 0.7156   | 0.0034 | 0.0038 | 0.3707    | 0.0009 | 0.02  | 0.9639    | 0.00001   | 0.0077198 | 0.82     |
| 5q11.2      | rs854037    | rs854037   | 5  | A/G | 0.8  | 0.027 | 0.005 | 2.2x10-8  | 0.025 | 0.005 | 3.5x10-8  | 0.0092 | 0.0047 | 0.05255  | 0.0025 | 0.005  | 0.6186   | 0.0007 | 0.0044 | 0.8736    | 0.02   | 0.024 | 0.4014    | 0.0128372 | 0.0064301 | 0.042    |
| LCORL       | rs925098    | rs925098   | 4  | G/A | 0.28 | 0.034 | 0.004 | 5.4x10-16 | 0.032 | 0.004 | 1.3x10-15 | 0.0064 | 0.0041 | 0.1155   | 0.0082 | 0.0042 | 0.05414  | 0.0044 | 0.0039 | 0.2498    | -0.043 | 0.021 | 0.0365    | 0.0086002 | 0.0065189 | 0.11     |
| ZBTB7B      | rs3753639   | rs3753639  | 1  | C/T | 0.23 | 0.031 | 0.004 | 7.3x10-12 | 0.031 | 0.004 | 1.3x10-12 | NA     | NA     | NA       | NA     | NA     | NA       | NA     | NA     | NA        | NA     | NA    | 0.0086002 | 0.0227782 | 0.72      |          |
| NT5C2       | rs74233809  | rs11191582 | 10 | C/T | 0.08 | 0.037 | 0.007 | 5.2x10-8  | 0.039 | 0.006 | 1.8x10-9  | 0.0002 | 0.0064 | 0.9756   | 0.0015 | 0.0066 | 0.8145   | NA     | NA     | NA        | NA     | NA    | 0.0128372 | 0.0074933 | 0.075     |          |
| PEPD        | rs10402712  | rs11667352 | 19 | A/G | 0.27 | 0.022 | 0.004 | 4.4x10-7  | 0.023 | 0.004 | 2.3x10-8  | 0.0059 | 0.0038 | 0.1234   | -0.01  | 0.004  | 0.008841 | 0.0045 | 0.006  | 0.4497    | -0.036 | 0.033 | 0.2727    | 0.0086002 | 0.0065189 | 0.16     |
| ACTL9       | rs61154119  | rs11670067 | 19 | T/G | 0.84 | 0.028 | 0.005 | 1.1x10-7  | 0.028 | 0.005 | 2.3x10-8  | 0.0037 | 0.0033 | 0.4837   | 0.0091 | 0.0054 | 0.0923   | 0.0016 | 0.0035 | 0.6429    | -0.015 | 0.019 | 0.4157    | 0.0043214 | 0.00878   | 0.66     |
| ADCY5       | rs11719201  | rs11708067 | 3  | T/C | 0.23 | 0.046 | 0.004 | 2.4x10-26 | 0.046 | 0.004 | 6.4x10-27 | -0.027 | 0.0047 | 8.72E-09 | 0.0031 | 0.0049 | 0.5302   | 0.0121 | 0.0054 | 0.0236    | -0.02  | 0.031 | 0.5228    | 0.0413927 | 0.0070207 | 1.40E-08 |
| IGF1R       | rs7402982   | rs2017500  | 15 | A/G | 0.42 | 0.023 | 0.004 | 2.3x10-9  | 0.023 | 0.004 | 1.1x10-9  | 0.0065 | 0.007  | 0.354    | 0.0027 | 0.0068 | 0.6883   | 0.0145 | 0.0042 | 0.0005046 | -0.093 | 0.023 | 6.642E-05 | 0.0128372 | 0.0107647 | 0.23     |
| JAG1        | rs6040076   | rs2206815  | 20 | C/G | 0.51 | 0.023 | 0.004 | 2.0x10-9  | 0.022 | 0.004 | 7.2x10-9  | 0.0014 | 0.0038 | 0.7109   | 0.0017 | 0.0039 | 0.6728   | 0.01   | 0.0059 | 0.0875    | NA     | NA    | NA        | 0.0001    | 0.0066494 | 0.99     |
| CLDN7       | rs113086489 | rs222857   | 17 | T/C | 0.55 | 0.031 | 0.004 | 9.1x10-16 | 0.03  | 0.004 | 1.3x10-15 | 0.0075 | 0.0041 | 0.06633  | 0.0037 | 0.0042 | 0.3886   | 0.0068 | 0.0035 | 0.05263   | 0.016  | 0.019 | 0.4039    | 0.0086002 | 0.0065189 | 0.15     |
| HHEX-IDE    | rs61862780  | rs2497306  | 10 | T/C | 0.52 | 0.028 | 0.004 | 3.0x10-14 | 0.028 | 0.004 | 9.5x10-15 | 0.0066 | 0.0036 | 0.06918  | 0.0036 | 0.0038 | 0.3373   | 0.0005 | 0.0037 | 0.8974    | 0.04   | 0.021 | 0.04996   | 0.049218  | 0.0059366 | 7.70E-14 |
| WNT4-ZBTB40 | rs2473248   | rs2744728  | 1  | C/T | 0.87 | 0.033 | 0.006 | 1.1x10-8  | 0.033 | 0.005 | 1.1x10-9  | 0.0018 | 0.0055 | 0.7387   | 0.0036 | 0.0056 | 0.5255   | 0.0044 | 0.0034 | 0.2048    | -0.021 | 0.019 | 0.2581    | 0.0043214 | 0.0077198 | 0.67     |
| GPR139      | rs1011939   | rs2764742  | 16 | G/A | 0.31 | 0.022 | 0.004 | 1.3x10-7  | 0.024 | 0.004 | 2.7x10-9  | 0.0004 | 0.0039 | 0.9268   | 0.0034 | 0.004  | 0.4388   | 0.0098 | 0.0051 | 0.05208   | 0.0094 | 0.028 | 0.7351    | 0.0043214 | 0.005513  | 0.61     |
| PHF19       | rs7847628   | rs3933326  | 9  | G/A | 0.67 | 0.023 | 0.004 | 1.0x10-8  | 0.023 | 0.004 | 5.4x10-9  | 0.0048 | 0.0042 | 0.2491   | 0.0001 | 0.0044 | 0.9787   | -0.005 | 0.0037 | 0.171     | 0.011  | 0.02  | 0.5924    | -0.0001   | 0.0066494 | 0.99     |
| C20orf203   | rs28530618  | rs6057610  | 20 | A/G | 0.5  | 0.026 | 0.004 | 7.7x10-12 | 0.024 | 0.004 | 8.4x10-11 | 0.0028 | 0.0037 | 0.4517   | 0.0054 | 0.0039 | 0.161    | 0.0016 | 0.004  | 0.6848    | 0.0024 | 0.021 | 0.9098    | -0.0001   | 0.005513  | 0.87     |
| CDKAL1      | rs35261542  | rs7756992  | 6  | C/A | 0.73 | 0.044 | 0.004 | 4.4x10-27 | 0.044 | 0.004 | 9.7x10-29 | 0.0095 | 0.0041 | 0.02038  | 0.011  | 0.0042 | 0.01073  | 0.002  | 0.0034 | 0.5627    | -0.013 | 0.018 | 0.4656    | 0.0606978 | 0.0057816 | 1.60E-26 |
| ESR1        | rs1101081   | rs851978   | 6  | C/T | 0.73 | 0.038 | 0.004 | 1.6x10-19 | 0.037 | 0.004 | 6.1x10-20 | 0.0006 | 0.0041 | 0.8855   | 0.0011 | 0.0042 | 0.7921   | 0.0178 | 0.0038 | 3.204E-06 | -0.045 | 0.021 | 0.03732   | 0.0043214 | 0.0065835 | 0.52     |
| FES         | rs12906125  | rs1894400  | 15 | G/A | 0.69 | 0.023 | 0.004 | 1.7x10-8  | 0.023 | 0.004 | 1.0x10-8  | NA     | NA     | NA       | NA     | NA     | NA       | 0.0002 | 0.0038 | 0.9567    | 0.0068 | 0.021 | 0.7513    | 0.0086002 | 0.0162421 | 0.61     |
| PTCH1       | rs28510415  | rs28446116 | 9  | G/A | 0.09 | 0.056 | 0.007 | 1.5x10-17 | 0.053 | 0.006 | 4.0x10-16 | NA     | NA     | NA       | NA     | NA     | NA       | 0.0089 | 0.008  | 0.2705    | NA     | NA    | NA        | 0.0211893 | 0.0303565 | 0.47     |

**eTable 10. Association of the genetic risk score with birth weight and F statistic for the instrumental variable in the NHS, HPFS, and WHI cohorts**

| Study | F statistic test for Instrumental variable |        |         |              |
|-------|--------------------------------------------|--------|---------|--------------|
|       | Beta                                       | SE     | P-value | F statistics |
| NHS   | 0.015                                      | 0.0035 | <.0001  | 18.28        |
| HPFS  | 0.026                                      | 0.006  | <.0001  | 18.34        |

Linear regression models were used to examine the association of genetic risk score with birth weight.



**eTable 11. Association of birth weight genetic risk score with confounders according to quartiles of the GRS in the NHS, HPFS and WHI studies.**

| Confounders                  | NHS         |             |             |             | P-value | HPFS        |             |             |             | P-value |
|------------------------------|-------------|-------------|-------------|-------------|---------|-------------|-------------|-------------|-------------|---------|
|                              | Q1          | Q2          | Q3          | Q4          |         | Q1          | Q2          | Q3          | Q4          |         |
| n                            | 2675        | 2273        | 3001        | 2724        |         | 2675        | 2273        | 3001        | 2724        |         |
| Age (years)                  | 54 ± 6      | 54 ± 6      | 54 ± 6      | 54 ± 6      | 0.61    | 54 ± 6      | 54 ± 6      | 54 ± 6      | 54 ± 6      | 0.61    |
| BMI (kg/m <sup>2</sup> )     | 25.8 ± 4.9  | 25.7 ± 4.6  | 25.8 ± 4.7  | 25.8 ± 4.8  | 0.67    | 25.8 ± 4.9  | 25.7 ± 4.6  | 25.8 ± 4.7  | 25.8 ± 4.8  | 0.67    |
| Total energy intake (MJ/day) | 7.46 ± 2.03 | 7.50 ± 2.01 | 7.47 ± 2.05 | 7.44 ± 2.02 | 0.74    | 7.46 ± 2.03 | 7.50 ± 2.01 | 7.47 ± 2.05 | 7.44 ± 2.02 | 0.74    |
| Alcohol (g/day)              | 6.4 ± 10.2  | 6.6 ± 10.7  | 6.4 ± 10.1  | 6.2 ± 9.8   | 0.61    | 6.4 ± 10.2  | 6.6 ± 10.7  | 6.4 ± 10.1  | 6.2 ± 9.8   | 0.61    |
| Current smokers (%)          | 17.6        | 14.5        | 15.2        | 16.1        | 0.18    | 17.6        | 14.5        | 15.2        | 16.1        | 0.18    |

Continued

| Variant   | Chr | Position | Eff. allele | Body mass index (BMI) |          | Alcohol intake frequency. |          | Smoking status |          |
|-----------|-----|----------|-------------|-----------------------|----------|---------------------------|----------|----------------|----------|
|           |     |          |             | beta                  | pv       | beta                      | pv       | beta           | pv       |
| rs1042725 | 12  | 66358347 | C           | 0.006785              | 0.39569  | -0.01309                  | 0.31209  | -0.00136       | 0.28965  |
| rs1801253 | 10  | 1.16E+08 | C           | -0.00686              | 0.451    | 0.001565                  | 0.62774  | -0.00107       | 0.46301  |
| rs4432842 | 5   | 57172078 | C           | -0.01078              | 0.21557  | 0.003539                  | 0.25052  | -0.00337       | 0.015596 |
| rs6931514 | 6   | 20703952 | G           | -0.03898              | 1.81E-05 | -0.00253                  | 0.43045  | 0.001758       | 0.22677  |
| rs724577  | 4   | 17993410 | C           | 0.010971              | 0.22786  | 0.003817                  | 0.23647  | -0.00189       | 0.19634  |
| rs900400  | 3   | 1.57E+08 | T           | 0.029383              | 0.000374 | -0.002                    | 0.49269  | -0.00106       | 0.42387  |
| rs9883204 | 3   | 1.23E+08 | C           | -0.02573              | 0.004625 | -0.00633                  | 0.048369 | 0.002168       | 0.13584  |

CData are mean ± SD or percentage (%).

p values for difference are based on Analysis of variance (ANOVA) for continuous data or chi square test for categorical data

## **eAppendix: Description of included studies**

### **NHS**

The NHS began in 1976, when 121,700 female registered nurses aged 30-55 y residing in 11 states were recruited to complete a baseline questionnaire about their lifestyle and medical history. Questionnaires were collected at baseline and biennially thereafter, to update information on lifestyle factors and the occurrence of chronic diseases. In the current analysis, we used 1990 as baseline in the NHS, when the earliest complete dietary data were collected. Our analysis included 13,000 women whose genotype data were available. All of the participants were Caucasians and were free of cancer at baseline. The study protocol was approved by the institutional review boards of Brigham and Women's Hospital and Harvard School of Public Health.

### **HPFS**

The HPFS was initiated in 1986, and was composed of 51,529 male dentists, pharmacists, veterinarians, optometrists, osteopathic physicians, and podiatrists, aged 40-75 y at baseline. The male participants returned a baseline questionnaire about detailed medical history, lifestyle, and usual diet. Questionnaires were collected at baseline and biennially thereafter, to update information on lifestyle factors and the occurrence of chronic diseases. In the current analysis, we used 1990 as baseline in the HPFS, when the earliest complete dietary data were collected. Our analysis included 8,000 men whose genotype data were available. All of the participants were Caucasians and were free of cancer at baseline. The study protocol was approved by the institutional review boards of Brigham and Women's Hospital and Harvard School of Public Health.

### **DCH**

The present study includes a case-cohort sample of 1,812 cases who developed T2DM before 31 Dec 2006, and 1,633 randomly selected controls, nested within the population-based Diet, Cancer and Health cohort. Diet, Cancer and Health is a Danish prospective cohort study originally aimed at investigating the associations between dietary habits, lifestyle, and cancer development. The participants were recruited during 1993-1997. A total of about 160,725 individuals were invited by mail, and 57,053 were enrolled into the study cohort. The participants are men and women born in Denmark, living in the greater Copenhagen or Aarhus areas, aged 50-64 years, and with no previous cancer diagnosis.

### **GOYA**

The GOYA (Male) cohort is a longitudinal case-cohort (obese, non-obese) study comprising a randomly (1%) selected control group and all extremely overweight men identified among 362,200 Caucasian men examined at the mean age of 20 years at the draft boards in Copenhagen and its surrounding areas during 1943-1977. Obesity was defined as 35% overweight relative to a local standard in use at the time (mid 1970's), corresponding to a BMI  $\geq 31.0$  kg/m<sup>2</sup>, which proved to be above the 99th percentile. All of the obese and 50% of the random sampled controls, who were still living in the region, were invited to a follow-up survey in 1992-94 at the mean age of 46 years, at which time the blood samples were taken and genotyping were performed for a total of 673 extremely overweight and 792 controls. With a sampling fraction of 0.5% (50% of 1%), the controls represent about 158,000 men among whom the case group was the most obese.

### **Raine Study**

The Western Australian Pregnancy Cohort (Raine) Study is a prospective pregnancy cohort where 2,900 mothers were recruited between 1989 and 1991. Recruitment took place at Western Australia's major perinatal centre, King Edward Memorial Hospital, and nearby private practices. Women who had sufficient English language skills, an expectation to deliver at King Edward Memorial Hospital, and an intention to reside in Western Australia to allow for future follow-up of their child were eligible for the study. The Raine Study is known to be one of the largest successfully prospective cohorts richly phenotyped at multiple time points over pregnancy, infancy, childhood adolescence, and young adult. The mothers completed questionnaires regarding their children and the children had physical examinations at ages 1, 2, 3, 6, 8, 10, 14, 17, 20 and 22 years.

### **COPSAC REGISTRY**

The COPSAC Registry is part of the Danish birth register comprising childhood asthma cases with data available on birth related traits plus genomic profiling. This cohort contributes in the birthweight-gene variant associations necessary for the current study.

### **COPSAC-CHILDREN**

The COPSAC cohort comprises birth weight measures and data combined from two Danish birth cohorts: the COPSAC2000 and the COPSAC2010 studies. The COPSAC2000 cohort is a prospective clinical birth cohort study of 411 children of asthmatic mothers whereas the COPSAC2010 birth cohort is a population based longitudinal clinical study of 700 pregnant women and their offspring.

### **GESUS**

The Danish General Suburban Population Study Invited all inhabitants  $\geq 30$  years old and 25% of people 20-29 years old with a valid Danish civil registration number from 2010-2013. 21,205 adults participated (participation rate 43%). Data come from questionnaires and clinical examinations. For this study we included 14,169 adults who were term at birth (871 were preterm, the rest unknown) and with a valid birth weight. 99% of participants were white.

### **Generation R**

The Generation R Study is a population-based prospective cohort study from fetal life onwards in Rotterdam, the Netherlands. All children were born between April 2002 and January 2006. Enrolment was aimed at early pregnancy, but was allowed until birth of the child. A total of 9,778 mothers and their children were included. The current analysis includes the 2,701 European-ancestry children with genome-wide scan data and birth weight data. The study was approved by the Medical Ethics Committee of the Erasmus MC, University Medical Center Rotterdam and written informed consent was obtained for all participants.

### **YFS**

The Cardiovascular Risk in Young Finns (YFS) is a population-based 27 year follow up-study (<http://med.utu.fi/cardio/youngfinnsstudy/>). The first cross-sectional survey was conducted in 1980, when 3,596 Caucasian subjects aged 3-18 years participated. In adulthood, the latest 27-year follow-up study was conducted in 2007 (ages 30-45 years) with 2,204 participants. The study cohort for the present analysis comprised subjects who had participated in the study in 2007 and had validated dietary data from FFQ, available genotype and other risk factor data. The dietary intake of nutrients was assessed using a modified 131-item food frequency questionnaire developed by the Finnish National Institute for Health and Welfare. The study was approved by the local Ethical Committees and was performed according to Helsinki declaration.

### **MESA**

The Multi-Ethnic Study of Atherosclerosis (MESA) is a study of the characteristics of subclinical cardiovascular disease (disease detected non-invasively before it has produced clinical signs and symptoms) and the risk factors that predict progression to clinically overt cardiovascular disease or progression of the subclinical disease. MESA researchers study a diverse, population-based sample of 6,814 asymptomatic men and women aged 45-84 at baseline. Thirty-eight percent of the recruited participants were white, 28 percent African-American, 22 percent Hispanic, and 12 percent Asian, predominantly of Chinese descent. Participants were recruited from six field centers across the United States and followed-up five times with an average time period of follow-up of 2 years between each visit. Data from four visits (exam1 to exam5) was used for the analysis. The tenets of the Declaration of Helsinki were followed and institutional review board approval was granted at all MESA sites. Written informed consent was obtained from each participant.

### **MDC**

The Malmö Diet and Cancer study is a population-based cohort with 30,446 adults (62% women; 45-73 years) recruited at baseline in 1991-1996. In a cardiovascular sub-cohort 6103 adults were randomly selected from the parent Malmö cohort. 5040 adults with genotype information and who provided valid dietary information were eligible for the current analysis.

## **WGHS**

The WGHS is a prospective cohort of initially healthy U.S. women. Study participants were health professionals who were age 45 years and older and free of major chronic disease including cancer and cardiovascular disease at study entry (1992-1995). A total of 23,294 had confirmed self-reported European ancestry and genotyping information. There were a total of 12,768 WGHS participants who did not qualify for one or more of the following conditions: were a preterm birth, one of a multiple birth, had missing information for either of these variables, or had diabetes or hypertension at baseline. The present study was approved by the institutional review boards of Brigham and Women's Hospital and Harvard School of Public Health (Boston, MA)

## **THISEAS**

The Hellenic Study of Interactions between SNPs and Eating in Atherosclerosis Susceptibility (THISEAS) study is a case-control study designed to investigate the association between genetic and lifestyle environmental factors and the risk of coronary artery disease in men and women aged >25 yrs. The control group consists of individuals with no history of cardiovascular disease, while cases are individuals with coronary artery disease. Hematological, biochemical and anthropometric measurements were conducted to all participants. Dietary assessment and physical activity data were collected through face-to-face interview by well-trained scientists. MetaboChip was used for DNA analysis. Exclusion criteria for the control group were history of cardiovascular disease, cancer and/or other inflammatory disease.

## **DGDG**

T2DM case-control study including 1,376 individuals coming from 3 French cohorts: 679 diabetic subjects recruited at the laboratory CNRS UMR8199 and at the Endocrinology-Diabetology Department of the Corbeil-Essonnes Hospital, 697 controls coming from the cohort DESIR (Epidemiological Study on the Insulin Resistance syndrome). The inclusion criteria for cases are: T2DM mellitus 1997 American Diabetes Association (ADA) definition, family history of diabetes in first degree relatives, Body Mass Index (BMI) < 30 kg/m<sup>2</sup>. Controls are at least 45 years old, with a normal fasting glucose according to 1997 ADA and a BMI < 27 kg/m<sup>2</sup>. All individuals were genotyped with the Illumina HAP300 chip. Participants laying outside from CEPH cluster, defined by HapMap were discarded. Informed consent was obtained from all participants, and the French ethics committee approved the study protocol.

## **PREDIMED-Valencia**

The PREDIMED-Valencia study was initiated in 2003 including 1,094 participants. Valencia is one of the field centers participating in the PREvencion con DietaMEDiterranea (PREDIMED) trial. Eligible participants were community-dwelling persons (55-80 years for men; 60-80 years for women) who fulfilled at least one of two criteria: type2 diabetes or 3 or more cardiovascular risk factors. Here we used an observational cohort design and we included 1,023 PREDIMED-Valencia participants with valid genotype data for the analyzed SNPs. Prevalence of T2D was analyzed at baseline. Validated FFQ questionnaires were used at baseline. Weight and BMI were directly measured. The Institutional Review Board of the University of Valencia approved the study protocol.

## **LIFE Leipzig Heart**

LIFE Leipzig Heart is an observational of patients with suspect or confirmed coronary artery disease (PMID 22216169). Recruitment comprised patients receiving coronary angiography for diagnostic reasons for the first time, patients with confirmed stable left main coronary artery disease and patients with acute myocardial infarction. The study meets the ethical standards of the Declaration of Helsinki. It has been approved by the Ethics Committee of the Medical Faculty of the University of Leipzig, Germany (Reg. No 276-2005) and is registered at ClinicalTrials.gov (NCT00497887). Written informed consent including agreement with genetic analyses was obtained from all participants.

## **LIFE-Adult**

LIFE-Adult is a cohort of about 10,000 inhabitants of the city of Leipzig (Saxony, Germany) with primary age range between 40 and 79 years. Participants were phenotyped for several health and disease related parameters, including blood sampling (see PMID 26197779 for further details). All subjects gave written informed consent to participate in the examinations. The procedures were conducted according to the Declaration of Helsinki and were approved by the University of Leipzig's ethics committee (registration-number: 263-2009-14122009). LIFE-Adult is part of the Leipzig Research Center for Civilisation Diseases (LIFE).

### **HELENA**

Participants were recruited from 2006 to 2007 in 10 centres from 9 European countries (Athens and Heraklion in Greece, Dortmund in Germany, Ghent in Belgium, Lille in France, Pécs in Hungary, Rome in Italy, Västerås in Sweden, Vienna in Austria and Zaragoza in Spain). The protocol was approved by the appropriate ethics committee in each centre. Written, informed consent was obtained from each subject and both of his/her parents or legal representatives. Participation in the study was voluntary. The sample included a total of 3,865 adolescents recruited through their schools; the latter were randomly selected according to a proportional cluster sampling methodology taking into account geographical repartition within each city, private/public school ratio, and number of classes by school. In order to investigate clinical biochemistry assays and genetic analyses, one third of the classes were randomly selected for blood collection, resulting in a total of 1,155 subjects.

### **GOLDN**

The Genetics of Lipid Lowering Drugs and Diet Network Study was a clinical trial designed to understand genetic factors that influence the response of triglycerides to 1) the lipid-lowering drug fenofibrate and 2) a high fat meal challenge. The study comprised approximately 1,200 individuals from 200 families. In total, 821 participants with diet, genetic, and metabolic data were included in the present analysis.

### **BPRHS**

The Boston Puerto Rican Health Study is a longitudinal cohort designed to examine sociological, environmental, and genetic risk factors for chronic diseases and quality of life in Puerto Rican adults living in the greater Boston, Massachusetts, area. Recruitment occurred from 2004 to 2009. Participants included those who self-identified as Puerto Rican and who were English or Spanish speaking. A total of 1,500 study participants (aged 45-75 y) were recruited at the baseline. The present study was based on 1,312 participants who have complete data available at the baseline for the proposed study.

### **SWS**

The SWS recruited 12,583 non-pregnant women aged 20-34 years, living in the city of Southampton, UK. A total of 3,158 women subsequently gave birth to liveborn singleton infants within the study period. The present analyses involved two groups, the SWS women themselves (n = 1060 in this analysis) and their offspring (n = 2005 in this analysis).

### **LISA/GINIplus**

The influence of Life-style factors on the development of the Immune System and Allergies in East and West Germany (LISA) Study is a population based birth cohort study (1). A total of 3094 healthy, full-term neonates were recruited between 1997 and 1999 in Munich, Leipzig, Wesel and Bad Honnef. The participants were not pre-selected based on family history of allergic diseases.

A total of 5991 mothers and their newborns were recruited into the German Infant study on the influence of Nutrition Intervention PLUS environmental and genetic influences on allergy development (GINIplus) between September 1995 and June 1998 in Munich and Wesel (2). Infants with at least one allergic parent and/or sibling were allocated to the interventional study arm investigating the effect of different hydrolysed formulas for allergy prevention in the first year of life. All children without a family history of allergic diseases and children whose parents did not give consent for the intervention were allocated to the non-interventional arm. Detailed descriptions of the LISApplus and GINIplus studies have been published elsewhere (1,2). DNA was collected at the age 6

and 10 years. For the present analysis, only children from the Munich study center were included. For both studies, approval by the local Ethics Committees and written consent from participant's families were obtained.

1. Heinrich, J. et al. Allergens and endotoxin on mothers' mattresses and total immunoglobulin E in cord blood of neonates. *Eur Respir J* 20, 617-23 (2002).
2. von Berg, A. et al. Impact of early feeding on childhood eczema: development after nutritional intervention compared with the natural course - the GINIplus study up to the age of 6 years. *Clin Exp Allergy* 40, 627-36 (2010).

### **SCORM**

The Singapore Cohort Of the Risk factors for Myopia (SCORM) was initiated in three schools in Singapore. The total number of eligible students was 2,913. Of the 2,913, children from an eastern school (n = 660) and a northern school (n = 1,023) were invited to participate in November 1999, while children from a western school (n = 1,230) were invited to participate in May 2001. Of the 2,913, 1,979 children aged 7-9 years agreed to participate at baseline (participation rate = 67.9%): children from the eastern school (n = 313), northern school (n = 705) and western school (n = 961). There were four follow-up visits from 2000 to 2005. Of the 1,979 participants, 345 children (17.4%) were lost to follow-up and 1,634 children (82.6%) returned for ocular examination at age 11 years. Of the 1,634 children, we further excluded those that were non-myopic (n = 585), with missing data on age of onset of myopia (n = 14) and those with age of onset of myopia at age 11 (n = 107). Thus, the final sample size for the current analysis was 928 (n = 761 Chinese, n = 113 Malays and n = 54 Indians and others). Informed written consent was obtained after the nature of the study was explained to the parents. The tenets of the Declaration of Helsinki were observed and approved by the Singapore Eye Research Institute Ethics Committee.

### **STRIP**

The STRIP study is a prospective, randomized lifestyle intervention project that began in 1990-1992 when 1,062 infants aged 5 months were recruited to a dietary intervention trial with the main aim of replacing saturated fat with unsaturated fat in the child's diet. The intervention was continued until the age of 20 years and during the follow-up children's diet and other lifestyle factors, growth and biological risk factors have been closely monitored with repeated measurements.

### **CLHNS**

The Cebu Longitudinal Health and Nutrition Survey (CLHNS) is a community-based birth cohort study that originally enrolled 3,327 pregnant women in 1983-84 (3,080 singleton live births), and has since followed them and their offspring to the present. In 2005, 1,895 healthy Filipino mothers and 1,775 of their offspring remained in the study and from whom DNA and measurement of biomarkers were collected. Trained field staff conducted in-home interviews and collected anthropometric measurements and comprehensive environmental data at each visit (data available online at <http://www.cpc.unc.edu/projects/cebu/>). Blood samples, which were used for biomarker measurement and DNA extraction, were obtained in 2005. Our analysis included 1,798 CLHNS mothers with both genotype and phenotype data. Informed consent was obtained from all CLHNS participants, and the study protocol was approved by the University of North Carolina Institutional Review Board for the Protection of Human Subjects.

### **RS**

The Rotterdam Study I (RS) is a prospective cohort study ongoing since 1990 in the city of Rotterdam in the Netherlands. All inhabitants aged 55 years and over of the Ommoord district in the city of Rotterdam were invited to participate. In the current analyses we included 6,291 participants for whom we had genetic data available. The participants were all examined at baseline. They were interviewed at home (2 h) and then had an extensive set of examinations (a total of 5 h) in a specially built research facility in the centre of their district. These examinations were repeated every 3-4 years in characteristics that could change over time. The Rotterdam Study has been approved by the institutional review board (Medical Ethics Committee) of Erasmus Medical Center and by the review board of The Netherlands Ministry of Health, Welfare and Sports.

## **NEO**

The NEO study was designed for extensive phenotyping to investigate pathways that lead to obesity-related diseases. The NEO study is a population-based, prospective cohort study that includes 6,671 individuals aged 45-65 years, with an oversampling of individuals with overweight or obesity. At baseline, information on demography, lifestyle, and medical history have been collected by questionnaires. In addition, samples of 24-h urine, fasting and postprandial blood plasma and serum, and DNA were collected. Genotyping was performed using the Illumina HumanCoreExome chip, which was subsequently imputed to the 1000 genome reference panel. Participants underwent an extensive physical examination, including anthropometry, electrocardiography, spirometry, and measurement of the carotid artery intima-media thickness by ultrasonography. In random subsamples of participants, magnetic resonance imaging of abdominal fat, pulse wave velocity of the aorta, heart, and brain, magnetic resonance spectroscopy of the liver, indirect calorimetry, dual energy X-ray absorptiometry, or accelerometry measurements were performed. The collection of data started in September 2008 and completed at the end of September 2012. Participants are currently being followed for the incidence of obesity-related diseases and mortality.

## **CHOP**

The Childhood Obesity Project (CHOP) was conducted as a European multicenter, double-blind, randomized clinical trial that enrolled healthy infants born between October 2002 and July 2004. Formula-fed infants (n = 1,090) were randomly assigned to receive higher protein (HP)- or lower protein (LP)-content formula (within recommended amounts) in the first year of life; breastfed infants (n = 588) were enrolled as an observational reference group. Weight, length, weight-for-length, and BMI were determined at inclusion and at 3, 6, 12, and 24 months of age. The primary endpoints were length and weight at 24 months of age. Anthropometric data have been followed since then biannually up to the age of 6 years and at age 8 and 11 years in this ongoing cohort. Comprehensive nutritional, (epi-)genetic and metabolic measurements in the participating children were also collected as well as data on parental and child's medical history and life-style factors (see: Koletzko B, AJCN 2009; 89:1836-45 (PMID:19386747); Weber M, AJCN 2014;99:1041-51 (PMID:24622805); Rzehak P, Scientific reports 2017;7:14349 (PMID:29084944); Kirchberg FF, J Clin Endocrinol Metab. 2015;100:149-58 (PMID:25368978))

## **WHI**

The Women's Health Initiative (WHI) is a large, multi-centre study designed to study major causes of morbidity and mortality in postmenopausal women. The WHI includes a clinical trial (CT) and an observational study (OS) cohort. Women meeting eligibility criteria (age 50-79, postmenopausal, minimum life expectancy 3 years) were recruited at 40 US clinical centres between 1 September 1993 and 31 December 1998. The study sample included 161,808 participants enrolled in the WHI Observational Study and in the three overlapping clinical trials (hormone therapy, dietary modification, and calcium plus vitamin D) prospectively followed for an average of 12 years or until earliest of treated T2DM, death, loss to follow-up, or end of study. Written informed consent was obtained from all study participants before study enrollment, and each of the trials was approved by the Institutional Review Boards of the 40 participating institutions.

## **YH3 & YH2000**

The Young Hearts (YH) project is a prospective study investigating the development of biological and behavioural risk factors for cardiovascular disease in an adolescent population in Northern Ireland. Briefly, in 1989-1990, a 2% representative sample of school children aged 12 and 15 years in Northern Ireland (YH1, n=1,015) was collected. The original 12-year-old population was followed up in 1992-1993 (YH2) with complete data collected on 225 boys and 230 girls (90% response rate). Between 1997 and 1999, all original YH participants were invited to participate in the third screening phase (YH3, age 12-15 years, n= 489), and a blood sample for DNA extraction was taken at that time. A further cross-sectional survey, the Young Hearts 2000 (YH2000), was carried out in 2000. Approximately 2,000 boys and girls aged 12 and 15 years (500 in each of the four age-sex groups) were recruited through post-primary schools.

### **DF-TJ**

The Dongfeng-Tongji Cohort (DF-TJ) was launched in 2008, and conducted by Tongji Medical College, Huazhong University of Science and Technology and Dongfeng Motor Corporation (DMC). There are 27,009 (87% of 31,000) retirees of DMC who responded to a questionnaire and provided baseline blood samples. Our analysis included 1,452 participants whose genotype data were available. All participants in our study provided written informed consent.

### **HCS**

In 1998, a cohort of men and women born 1931-1939 in the county of Hertfordshire, United Kingdom and still resident there, was recruited to participate in studies examining the interactions between early life, diet, adult lifestyle, and genetic factors as determinants of adult disease. A total of 3,225 men and women, aged 59-73 years, were interviewed at home where information was obtained on the participant's medical and social history by a trained research nurse. Subsequently, 2,997 men and women attended a clinic for further investigations.

### **1958BC**

The British 1958 birth cohort (1958BC) includes all births during one week in March in 1958 in England, Scotland and Wales. Approximately 17,000 participants were recruited at birth and were subsequently followed up at ages 7, 11, 16, 23, 33, 42, 45 and 50 years. At each follow-up, information on socioeconomic status, health and development, and familial and education factors were obtained. At 33 and 42 years, diet, lifestyle and occupational factors were also collected. At 45 years of age, 11,971 participants currently living in Britain were invited to take part in a biomedical survey, of whom 9,377 (78%) filled in a questionnaire and 8,302 (89%) also provided a blood sample, in which DNA was extracted for genotyping.

### **Biobank Japan**

The Biobank Japan Project was started in 2003 for aiming at the implementation of personalized medicine as a leading project of MEXT, Japanese government. This project developed a disease (patient-registered) biobank of 47 common diseases in collaboration with 12 cooperating institutes and collected a total of 200,000 patients' DNA and clinical information. Various clinical information was collected from interview or medical records by using standardized questionnaire. All participants gave written informed consent to this study. This study was approved by ethical committees of RIKEN and participating institutes.

### **LURIC**

The LURIC study included 3,316 Caucasians hospitalized for coronary angiography between 1997 and 2000 at a tertiary care centre in south-western Germany. Clinical indications for angiography were chest pain or a positive non-invasive stress test suggestive of myocardial ischemia. To limit clinical heterogeneity, individuals suffering from acute illnesses other than acute coronary syndrome, chronic non-cardiac diseases and a history of malignancy within the five past years were excluded. The study was approved by the ethics committee at the "Landesärztekammer Rheinland-Pfalz" and was conducted in accordance with the "Declaration of Helsinki". Informed written consent was obtained from all participants.

### **ARIC**

ARIC is a multi-center prospective investigation of atherosclerotic disease in a predominantly bi-racial population conducted in four U.S. communities, involving both cohort and community surveillance components. Study participants aged 45-64 years at baseline were recruited from 4 communities: Forsyth County, North Carolina; Jackson, Mississippi; suburban areas of Minneapolis, Minnesota; and Washington County, Maryland. A total of 15,792 individuals participated in the baseline examination in 1987-1989, with follow-up examinations in approximate 3-year intervals, during 1990-1992, 1993-1995, and 1996-1998. Weight and height were measured. All study participants provided written informed consent.



### **Bogalusa Study**

The Bogalusa Heart Study is a community-based study of the natural history of cardiovascular disease since childhood in the community of Bogalusa, Louisiana. The study is longitudinal, and the initial cross-sectional study began in 1973-1974. Subsequent cross-sectional surveys were conducted every 34 years during childhood and young adulthood. Our analysis included 619 subjects whose genotype and birth weight data were available. Information on personal health and medication history was obtained from participants through questionnaires. Standard protocols approved by the Institutional Review Board of the Tulane University Health Sciences Center were used for the collection of all data. Written informed consent was obtained from the participants, or their parents (guardians) if the participants were children.

### **SiMES**

Singapore Malay Eye Study (SiMES) was conducted at the Singapore Eye Research Institute (SERI) and designed to quantify the prevalence of and risk factors for visual impairment and major eye diseases, including refractive errors, glaucoma, cataract, diabetic retinopathy, and age-related maculopathy, in an adult urban Malay population in Singapore.

### **SINDI**

Singapore Indian Eye Study (SINDI) was designed to quantify the prevalence, environmental and genetic risk factors, and impacts of visual impairment and major eye diseases in Singapore Indian population.

### **DC-SP2 (SP2-SDCS-610 and SP2-SDCS-1M)**

Diabetic Cohort (DC) was designed to study the prevalence of diabetes in Singapore Chinese population.

### **SCES**

Singapore Chinese Eye Study (SCES) was designed to quantify the prevalence, environmental and genetic risk factors, and impacts of visual impairment and major eye diseases in Singapore Chinese population.

### **CHS**

The CHS is a population-based longitudinal study of risk factors for cardiovascular disease and stroke in adults 65 years of age or older, recruited at four field centers (Forsyth County, NC; Sacramento County, CA; Washington County, MD; Pittsburgh, PA). Overall, 5,201 predominantly Caucasian individuals were recruited in 1989-1990 from random samples of Medicare eligibility lists, followed by an additional 687 African-Americans recruited in 1992-1993 (n=5,888). The CHS GWAS, which had the primary aim of studying incident cardiovascular events, focused on 3,980 participants free of clinical cardiovascular disease at baseline, who consented to genetic testing, and with DNA available for genotyping. CHS Study samples were genotyped using the Illumina HumanCNV370-Duo BeadChip system. Participants of European descent were included in this analysis. Genotyping was successful in 3,291 Caucasian subjects. Participants were eligible for the present investigation if their genotyping was complete and they had available phenotype information. Samples with call rate <95% were excluded. A total of 306,655 autosomal SNPs were used in imputation after filtering out SNPs with HWE deviation  $P \leq 1 \times 10^{-5}$ , call frequency  $\leq 97\%$ , zero heterozygote frequency, missing from dbSNP, and >1 duplicate or Mendelian inconsistency.

### **SCHS (SCHS-T2D)**

This study utilized data from a case-control GWAS study for T2DM that was nested within the Singapore Chinese Health Study (SCHS), a prospective cohort study of 63,257 Singaporean Chinese men and women aged 45-74 years living in Singapore between 1993 and 1998. The cohort study recruited only participants belonging to one of the two major Chinese dialect groups in Singapore, the Hokkiens or the Cantonese, who originated from two contiguous prefectures in southern China. In-person interviews and phlebotomy were conducted before the onset of disease. Baseline assessment was conducted through a face-to-face structured interview during recruitment. Information was

recorded by a trained interviewer using a structured questionnaire. Food frequency questionnaires were used to estimate usual diet among the SCHS participants and daily proportions of macronutrients intake. Starting in January 2000, the bio-specimen collection was extended to all surviving cohort members. By April 2005 when all subjects had been contacted, bio-specimens were collected from 32,543 participants, representing an approximately 60% consent rate. Various components (plasma, red blood cell, serum and white blood cell) of blood were separated and have been stored continuously at -80°C. Age was defined at the time of blood collection and sex and ethnicity was recorded as indicated in the participant's National Registration Identity Card (NRIC). Informed consent was obtained from all subjects and approval by the Institutional Review Board of the National University of Singapore was given for this study.

## eReferences

1. Horikoshi M, Yaghoobkar H, Mook-Kanamori DO, et al. New loci associated with birth weight identify genetic links between intrauterine growth and adult height and metabolism. *Nature genetics*. Jan 2013;45(1):76-82.
2. Higgins JP, Thompson SG, Deeks JJ, Altman DG. Measuring inconsistency in meta-analyses. *Bmj*. Sep 6 2003;327(7414):557-560.
3. Ioannidis JP, Patsopoulos NA, Evangelou E. Uncertainty in heterogeneity estimates in meta-analyses. *Bmj*. Nov 3 2007;335(7626):914-916.
4. Higgins JP, Thompson SG. Quantifying heterogeneity in a meta-analysis. *Stat Med*. Jun 15 2002;21(11):1539-1558.
5. Riley RD, Higgins JP, Deeks JJ. Interpretation of random effects meta-analyses. *Bmj*. 2011;342:d549.
6. Wald A. The fitting of straight lines if both variables are subject to error. *Ann Math Stat*. 1940;11:284-300.
7. Palmer TM, Sterne JA, Harbord RM, et al. Instrumental variable estimation of causal risk ratios and causal odds ratios in Mendelian randomization analyses. *Am J Epidemiol*. Jun 15 2011;173(12):1392-1403.
8. Horikoshi M, Beaumont RN, Day FR, et al. Genome-wide associations for birth weight and correlations with adult disease. *Nature*. Oct 13 2016;538(7624):248-252.
9. Mahajan A, Go MJ, Zhang W, et al. Genome-wide trans-ancestry meta-analysis provides insight into the genetic architecture of T2DM susceptibility. *Nature genetics*. Mar 2014;46(3):234-244.
10. Lawlor DA, Harbord RM, Sterne JA, Timpson N, Davey Smith G. Mendelian randomization: using genes as instruments for making causal inferences in epidemiology. *Statistics in medicine*. Apr 15 2008;27(8):1133-1163.
11. Burgess S, Scott RA, Timpson NJ, Davey Smith G, Thompson SG. Using published data in Mendelian randomization: a blueprint for efficient identification of causal risk factors. *European journal of epidemiology*. Jul 2015;30(7):543-552.
12. Burgess S, Butterworth A, Thompson SG. Mendelian randomization analysis with multiple genetic variants using summarized data. *Genetic epidemiology*. Nov 2013;37(7):658-665.
13. Bowden J, Davey Smith G, Burgess S. Mendelian randomization with invalid instruments: effect estimation and bias detection through Egger regression. *International journal of epidemiology*. Apr 2015;44(2):512-525.
14. Bowden J, Davey Smith G, Haycock PC, Burgess S. Consistent Estimation in Mendelian Randomization with Some Invalid Instruments Using a Weighted Median Estimator. *Genetic epidemiology*. May 2016;40(4):304-314.
15. Yavorska OO, Burgess S. MendelianRandomization: an R package for performing Mendelian randomization analyses using summarized data. *International journal of epidemiology*. Apr 07 2017.
16. Burgess S, Bowden J, Fall T, Ingelsson E, Thompson SG. Sensitivity Analyses for Robust Causal Inference from Mendelian Randomization Analyses with Multiple Genetic Variants. *Epidemiology*. Jan 2017;28(1):30-42.
17. Scott RA, Lagou V, Welch RP, et al. Large-scale association analyses identify new loci influencing glycemic traits and provide insight into the underlying biological pathways. *Nature genetics*. Sep 2012;44(9):991-1005.
18. Emdin CA, Khera AV, Natarajan P, et al. Genetic Association of Waist-to-Hip Ratio With Cardiometabolic Traits, T2DM, and Coronary Heart Disease. *Jama*. Feb 14 2017;317(6):626-634.
19. Centers for Disease Control and Prevention. National diabetes statistics report: estimates of diabetes and its burden in the United States, 2014. US Department of Health and Human Services. 2014. .
